# Supplementary material for: A simple method to describe the COVID-19 trajectory and dynamics in any country based on Johnson cumulative density function fitting
Source: PubMed Central journal article supplement (PMC8423734; doi:10.1038/s41598-021-97285-5), 2021-09-07
Supplement: 41598_2021_97285_MOESM1_ESM.pdf [file 41598_2021_97285_MOESM1_ESM.pdf]

# Supplementary Materials for

## **A simple method to describe the COVID-19 trajectory and dynamics in any country based on Johnson cumulative density function fitting.**

Adam M. Ćmiel\*<sup>1</sup>, Bogdan Ćmiel<sup>2</sup>

<sup>1</sup> Institute of Nature Conservation, Polish Academy of Sciences, al. A. Mickiewicza 33, 31-120 Kraków, Poland

<sup>2</sup> Faculty of Applied Mathematics, AGH University of Science and Technology, al. A. Mickiewicza 30, 30-059 Kraków, Poland

corresponding author: [cmiel@iop.krakow.pl](mailto:cmiel@iop.krakow.pl)

## Fitting Johnson cumulative density functions to cumulative epidemic waves

There is no strict definition of what is or is not an epidemic wave or phase. The intuitive definition of a pandemic wave traces the development of an epidemic over time and/or space. During an epidemic, the number of new cases of infection increases (often rapidly) to a peak and then falls (usually more gradually) until the epidemic wave is over. Each epidemic wave may be visualized by an epidemic curve (Fig. S1a). To visualize an epidemic curve, we put the number of cases on the vertical axis and the time unit on the horizontal axis. Another possible way of visualizing an epidemic wave is to place the cumulative number of cases on the vertical axis. In such cases, we obtain a cumulative epidemic curve (sigmoid shape instead of a "wave-like" shape; Fig. S1b). Nevertheless, the cumulative epidemic curve, even if it does not present the wave itself, describes the same epidemic wave or phase as the epidemic curve.

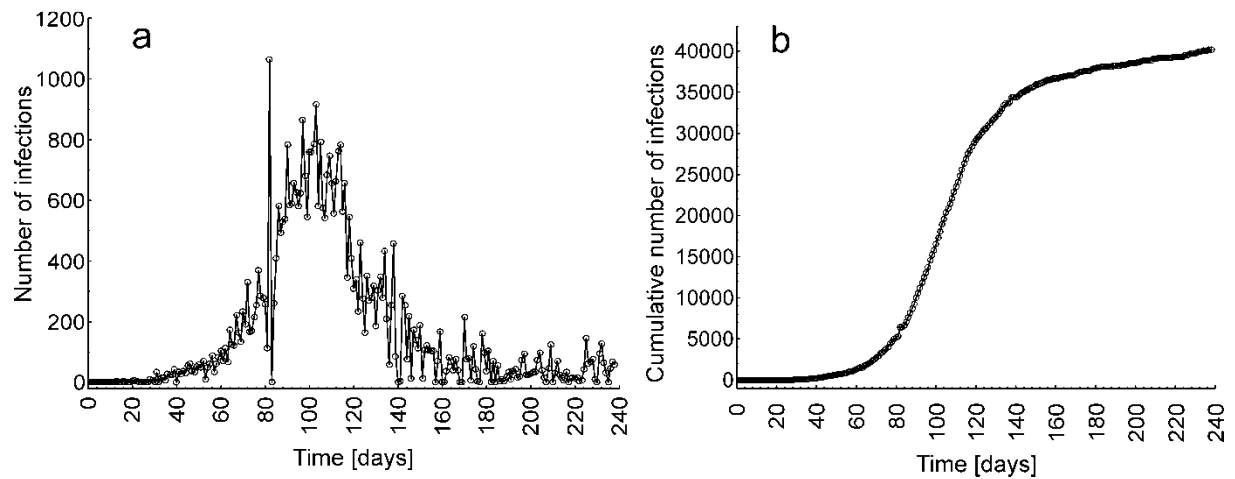

**Figure S1.** Examples of epidemic curves (a) and cumulative epidemic curves (b) describing the same infection wave in Afghanistan.

The method of fitting the Johnson cumulative density function to the epidemic wave is presented below.

## Fitting the Johnson Cumulative Density Curve to one epidemic wave

Let us suppose that epidemic waves can be described by a five-parameter scaled Johnson unbounded CDF: scale parameter ( $s$ ) and four moments – expected value (mean,  $E$ ), standard deviation ( $\sigma$ ), skewness ( $S$ ) and kurtosis ( $K$ ),

$$W(t)=s*F_{E,\sigma,S,K}(t) \quad (S1),$$

where  $t$  is the time measured since the day of the beginning of the pandemic, and the function  $F_{E,\sigma,S,K}$  is the Johnson unbounded ( $S_U$ ) CDF with some parameters  $\gamma$ ,  $\delta$ ,  $\zeta$ , and  $\lambda$  assuming the mean, standard deviation, skewness and kurtosis to be equal to  $E, \sigma, S$ , and  $K$ , respectively.

The method of fitting the Johnson CDF to the epidemic wave was presented on the data from Afghanistan. The fitting may be performed in 4 steps:

### *Step 1. Smoothing the raw data*

It is advised to smooth the raw data before the curve fitting process (e.g., using a moving average), especially when one is trying to perform curve fitting when one full epidemic wave is not observed (ongoing wave of infections). Although smoothing did not affect the fitting process to the full epidemic wave, it may be useful when fitting it to the ongoing wave of infections because smoothing the data decreases the sensitivity of the numerical estimation method to changes in the starting point values (see sensitivity analysis), which, in this case, are more difficult to evaluate (see step 3). Moreover, smoothing makes the loss function more regular, so for the numerical algorithm, it is more difficult to confuse the local minimum of the loss function with the global minimum.

### *Step 2. Visualizing the epidemic wave using the cumulative epidemic curve*

It is recommended that Johnson CDFs be fit to cumulative epidemic curves instead of fitting Johnson PDFs to the epidemic curves because the cumulative epidemic curve is a monotonic (nondecreasing) and smoother curve than the epidemic curve (Fig. S1a,b). In fact, the epidemic curve is a first derivative of the cumulative epidemic curve; thus, from estimation theory, it is already known that the estimation of derivatives is more difficult than the estimation of the curve itself. Moreover, considering the cumulative number of infections greatly reduces the random noise occurring in the daily number of infections (see Fig. S1).

### *Step 3. Finding starting points*

The main advantage of using an alternative fitting method (using moments instead of the original shape coefficients) is that at least three starting points for coefficients  $S$ ,  $E$ , and  $\sigma$  are intuitive and may be obtained visually from the cumulative epidemic curve (or at least, a range in which the values of the starting points are expected; Fig. S2).

When a full infection wave is observed, the value of the starting point for the scale parameter  $s$  may be evaluated as a value from the interval on the  $y$  axis, where the increase in the cumulative epidemic curve becomes low (in the case of Afghanistan, the  $s$  parameter was evaluated in approximately 40,000 infections; interval  $(S_L, S_U)$ ; Fig. S2). When only part of the infection wave is observed, the starting point may be evaluated as double the value of the cumulative epidemic curve in the moment of its fastest growth. However, this starting point may be very difficult to evaluate and highly underestimated when only the beginning of the infection wave is observed (also see Sensitivity analysis section which is presented later in this Supplementary Materials).

The value of the starting point for the  $E$  parameter may be evaluated visually from the cumulative epidemic curve, from the time interval  $(E_L, E_U)$ , which contains the period of the fastest growth of the curve (Fig. S2) and which is usually indicated by the inflexion point. When the inflexion point is not visible, the starting point for the  $E$  parameter may be difficult to predict, and its value should be set to at least the maximum value on the time axis (e.g., if 80 days of the infection wave are observed and no inflexion point is visible, the value of  $E$  may be set to  $\geq 80$ ).

The value of the starting point for the  $\sigma$  parameter may also be evaluated visually from the cumulative epidemic curve as an  $(\sigma_L, \sigma_U)$  interval (Fig. S2). The lower bound value may be obtained as a time period between the moment of the beginning of the fast increase of the cumulative curve to the inflexion point, while the upper bound value may be obtained as a time period between the inflexion point and the moment where the cumulative curve starts to "flatten". When the inflexion point is not visible, the starting point of the  $\sigma$  parameter may be difficult to predict, and its value should be set at least as high as the time period from the beginning of the fast increase of the cumulative curve to the last observation.

Obtaining the starting point for skewness ( $S$ ) and kurtosis ( $K$ ) parameters is more difficult because it is not possible to evaluate their values visually. However, if  $\sigma_L > \sigma_U$  is evaluated, it indicates that the starting point for the  $S$  parameter value is negative, while  $\sigma_L = \sigma_U$  or  $\sigma_L < \sigma_U$  indicates zero or positive values of the  $S$  parameter starting point, respectively. However, the sensitivity analysis of the algorithm to the changes in starting point values (see Sensitivity analysis) showed that when  $s$ ,  $E$  and  $\sigma$  are properly selected, the estimation method is not sensitive to the changes in the values of the starting points  $S$  and  $K$ . Thus, in the presented examples, the starting points for the  $S$  and  $K$  parameters were set to  $S=1$  and  $K=100$ .

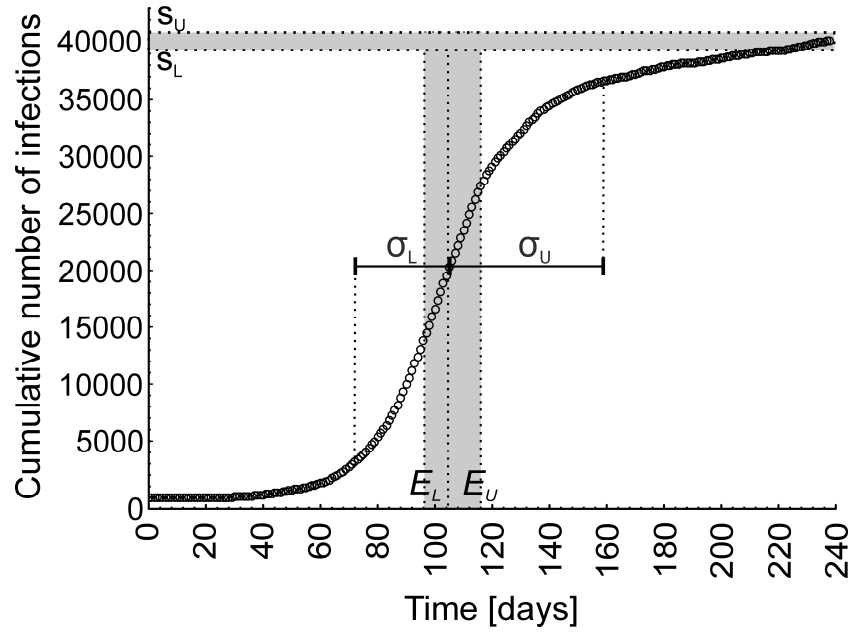

**Figure S2.** The general idea of the evaluation of the intervals where the values of starting points for parameters  $s$ ,  $E$  and  $\sigma$  are expected is to visually analyse the cumulative epidemic curve.

In conclusion, by visually analysing the cumulative epidemic curve from Afghanistan, starting point values may be evaluated at  $s \in (39000, 41000)$ ,  $E \in (96, 116)$ , and  $\sigma \in (30, 60)$ .

*Step 4. Fitting using alternative sets of starting points*

After visually selecting an initial set of starting points, it is recommended to perform fitting using other sets of starting points from the evaluated intervals. The results of 15 Johnson CDFs fitting to the cumulative epidemic curve from Afghanistan are presented in Table S1.

**Table S1.** Example of 10 Johnson curve fittings to the infection wave reported in Afghanistan using different sets of starting points.

| Selected starting points |     |          |     |     | Estimated curve parameters |         |          |         |         | $R^2$   |
|--------------------------|-----|----------|-----|-----|----------------------------|---------|----------|---------|---------|---------|
| $s$                      | $E$ | $\sigma$ | $S$ | $K$ | $s$                        | $E$     | $\sigma$ | $S$     | $K$     |         |
| 39000                    | 90  | 40       | 1   | 100 | 40005.49                   | 111.081 | 41.5161  | 3.53541 | 51.3501 | 0.99980 |
| 39000                    | 105 | 40       | 1   | 100 | 40005.49                   | 111.081 | 41.5161  | 3.53541 | 51.3501 | 0.99980 |
| 39000                    | 111 | 41       | 3.5 | 51  | 40005.49                   | 111.081 | 41.5161  | 3.53541 | 51.3501 | 0.99980 |
| 39000                    | 120 | 40       | 1   | 100 | 40005.49                   | 111.081 | 41.5161  | 3.53541 | 51.3501 | 0.99980 |
| 39000                    | 140 | 40       | 1   | 100 | 40005.49                   | 132.712 | 51.3125  | 3.12841 | 21.3694 | 0.9456  |
| 39000                    | 100 | 60       | 1   | 100 | 40005.49                   | 111.081 | 41.5161  | 3.53541 | 51.3501 | 0.99980 |
| 39000                    | 120 | 80       | 1   | 100 | 40005.49                   | 111.081 | 41.5161  | 3.53541 | 51.35   | 0.99980 |
| 39000                    | 110 | 50       | 5   | 100 | 40005.49                   | 111.081 | 41.5162  | 3.53541 | 51.3503 | 0.99980 |
| 39000                    | 120 | 10       | 3   | 20  | 40005.49                   | 111.081 | 41.5161  | 3.53541 | 51.3501 | 0.99980 |
| 39000                    | 100 | 50       | 0   | 0   | 38309.19                   | 104.56  | 24.3863  | 0       | 0       | 0.9980  |
| 41000                    | 105 | 40       | 1   | 100 | 40007.6                    | 111.098 | 41.5949  | 3.57839 | 52.7383 | 0.99978 |
| 41000                    | 111 | 41       | 3.5 | 51  | 40007.6                    | 111.098 | 41.5949  | 3.57839 | 52.7383 | 0.99978 |
| 41000                    | 120 | 40       | 1   | 100 | 40007.6                    | 111.098 | 41.5949  | 3.57839 | 52.7383 | 0.99978 |
| 40000                    | 111 | 45       | 1   | 60  | 40007.6                    | 111.098 | 41.5949  | 3.57839 | 52.7383 | 0.99978 |
| 40000                    | 111 | 40       | 1   | 100 | 40007.6                    | 111.098 | 41.5949  | 3.57839 | 52.7383 | 0.99978 |

The best fitted curve should be used as a final estimation result. In the case of Afghanistan, the best fitted curve ( $R^2=0.9998$ ) parameters are  $s=40005.49$ ,  $E=111.081$ ,  $\sigma=41.5161$ ,  $S=3.53541$  and  $K=51.3501$ . This curve can then be used to calculate the basic parameters describing the dynamics of the infection wave: the day the infection wave started ( $Q_{2.5\%}$ ), the day the infection wave ended ( $Q_{97.5\%}$ ), the day that half of the total percentage of infections during a given wave were reached ( $Q_{50\%}$ ), the day when the infection wave peaked (M), the duration of the wave ( $T$ ), the duration of the wave increase ( $t_i$ ), the duration of the wave decrease ( $t_d$ ), and wave asymmetry ( $A$ ; see eqs. 2-11 in the main text).

### **Adding more Johnson curves to fit more epidemic waves**

Let us suppose that  $n$  epidemic waves ( $W$ ) occurred in a given country and that each epidemic wave can be described by a five-parameter scaled Johnson unbounded CDF (see eq. S1). Thus, the trajectory of the epidemic  $E(t)$  can be described by

$$E(t)=W_{1,n}(t)+W_{2,n}(t)+\dots+W_{n,n}(t) \quad (S2)$$

Below, fitting multiple Johnson CDFs to fit the trajectory of the epidemic was presented for examples from Australia and Poland.

#### *Example 1. Fitting Johnsons CDFs to the data from Australia*

After smoothing the data, the epidemic trajectory in Australia was visualized as a cumulative epidemic curve. By visually analysing the cumulative epidemic wave, one can clearly distinguish two epidemic waves, which suggests that the epidemic trajectory in Australia can be described by two Johnson CDFs (Fig. S3a):

$$E(t)=W_{1,2}(t)+W_{2,2}(t) \quad (S3)$$

The parameters for each curve were obtained as described above (steps 3-4). Only the results for the best fitted curves are presented in this example. Moreover, for the sake of exemplification, the results of fitting only one Johnson CDF and three Johnson CDFs to the cumulative epidemic curve from Australia were also presented (Table S2, Fig. S3b).

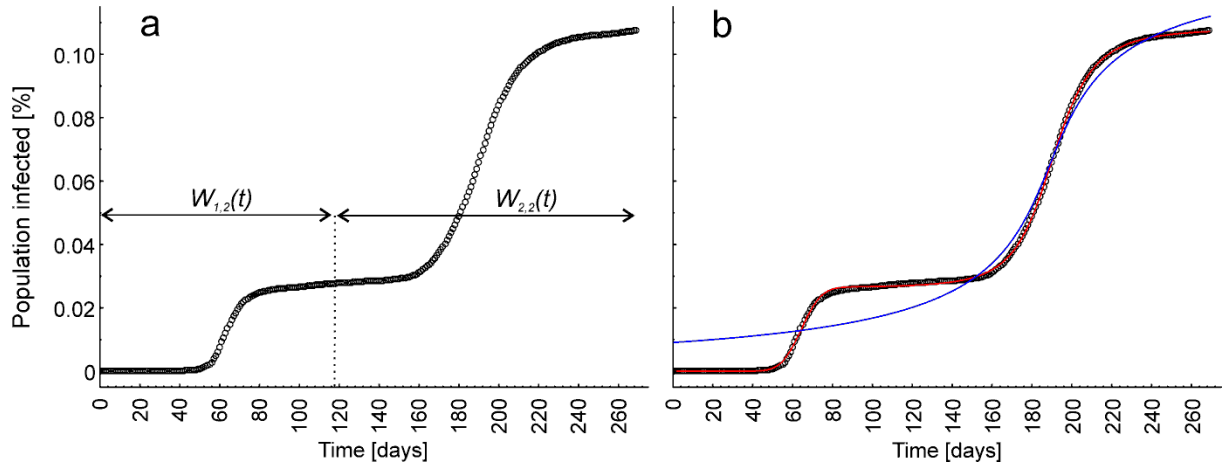

**Figure S3.** (a) The cumulative epidemic curve from Australia with easily distinguishable epidemic waves and (b) one fitted Johnson CDF (blue line) and two Johnson CDFs (red line) describing the epidemic trajectory in Australia.

**Table S2.** The results of fitting one, two and three Johnson CDFs to the cumulative epidemic curve from Australia.

| Number of Johnson CDFs fitted | Fitted curve                                                                                                                                                        | $R^2$   |
|-------------------------------|---------------------------------------------------------------------------------------------------------------------------------------------------------------------|---------|
| 1                             | $E(t)=0.130002 * F_{188.372, 1173.77, 0.00208045, 6.49738e+007}(t)$                                                                                                 | 0.96813 |
| 2                             | $E(t)=0.027695 * F_{67.0193, 15.1412, 4.91014, 91.1291}(t) + 0.0797208 * F_{191.801, 22.0842, 0.650094, 5.48317}(t)$                                                | 0.99996 |
| 3                             | $E(t)=0.02692 * F_{66.2612, 12.5528, 3.40836, 39.7692}(t) + 0.01277 * F_{240.259, 80.4446, 0.331707, 0.0043}(t) + 0.0724 * F_{190.511, 17.6172, 0.191, 1.13908}(t)$ | 0.99996 |

The results showed that the cumulative epidemic curve from Australia was best described by fitting two Johnson CDFs (Table S2; Fig. S3b). One Johnson CDF was far more poorly fitted than the two Johnson CDFs (Table S2, Fig. S3b), whereas fitting three Johnson CDFs did not improve the fit; thus, adding an additional five parameters is pointless.

*Example 2. Fitting Johnsons CDFs to the data from Poland*

After smoothing the data, the epidemic trajectory in Poland was visualized as a cumulative epidemic curve. However, unlike in Australia, it is not easy to visually obtain the number of epidemic waves (Fig. S4a). The cumulative epidemic curve in Poland may either be described by one epidemic wave

$$E(t)=W_{1,1}(t) \quad (S4),$$

two epidemic waves

$$E(t)=W_{1,1}(t)+W_{2,2}(t) \quad (S5),$$

or three epidemic waves

$$E(t)=W_{1,3}(t)+W_{2,3}(t) +W_{3,3}(t) \quad (S6).$$

The parameters for each curve were obtained as described above (steps 3-4). Only the results for the best fitted curves are presented in this example. Moreover, for the sake of example, the results of fitting four Johnson CDFs to the cumulative epidemic curve from Poland were also presented (Table S3, Fig. S4b).

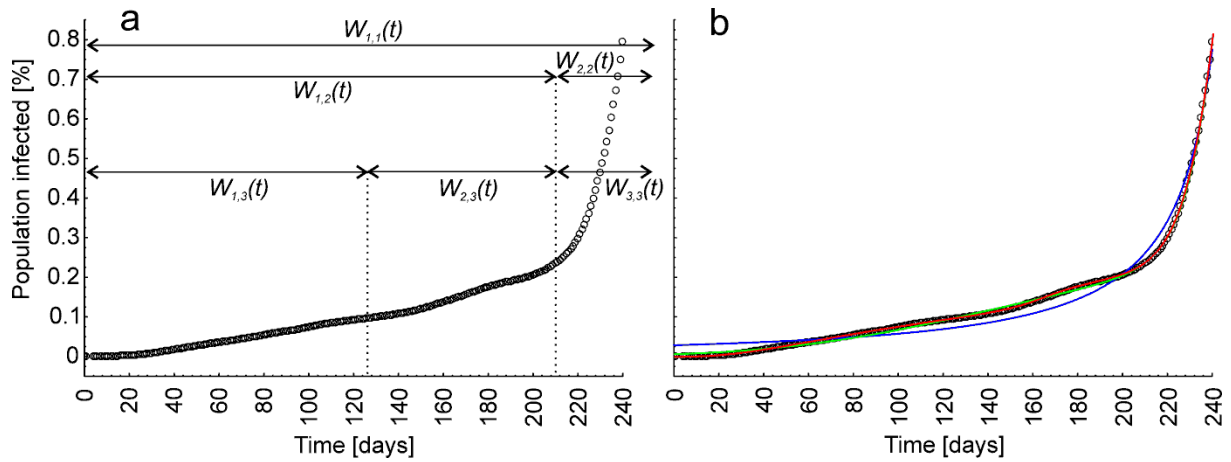

**Figure S4.** (a) The cumulative epidemic curve from Poland, which may be described by one, two or three epidemic waves, and (b) one fitted Johnson cumulative density function (blue line), two Johnson cumulative density functions (green line) and three Johnson cumulative density functions (red line) describing the epidemic trajectory in Poland.



**Table S3.** The results of fitting one, two, three and four Johnson cumulative density functions to the cumulative epidemic curve from Poland.

| Number of Johnson CDFs fitted | Fitted curve                                                                                                                                                                                                                                      | R <sup>2</sup> |
|-------------------------------|---------------------------------------------------------------------------------------------------------------------------------------------------------------------------------------------------------------------------------------------------|----------------|
| 1                             | $E(t) = 2.47592 * F_{247.841, 155.074, 0.00298371, 322200}(t)$                                                                                                                                                                                    | 0.96676        |
| 2                             | $E(t) = 0.223036 * F_{137.599, 72.0234, 0.00115829, 0.00168398}(t) + 2.71657 * F_{259.966, 32.7988, 2.75232, 25.4339}(t)$                                                                                                                         | 0.99789        |
| 3                             | $E(t) = 0.143335 * F_{112.426, 65.9492, 0.904095, 0.514262}(t) + 0.0658981 * F_{166.643, 25.4159, 0.00640294, 13.5111}(t) + 2.39085 * F_{250.757, 18.1073, 0.00110578, 1.72038}(t)$                                                               | 0.99981        |
| 4                             | $E(t) = 0.0766458 * F_{115.953, 41.487, 1.9145, 7.16402}(t) + 0.0713785 * F_{165.56, 16.8285, 0.00341615, 0.00525927}(t) + 2.35334 * F_{250.217, 18.5738, 0.00903355, 2.37484}(t) + 0.0414949 * F_{44.7297, 15.6349, 0.00632781, 0.000867302}(t)$ | 0.99982        |

The results showed that the cumulative epidemic curve from Poland was best described by fitting three Johnson CDFs (Table S3; Fig. S4b). Fitting one and two CDFs resulted in lower R<sup>2</sup> values compared to the R<sup>2</sup> of three Johnson CDFs, whereas adding the fourth Johnson CDF improved the fit only by 0.00001, suggesting that it is not worth adding an additional five parameters to the estimate (Table S3).

## Sensitivity analysis

Sensitivity analysis was performed to check 1) the sensitivity of the numerical algorithm to data perturbation, 2) the sensitivity of the algorithm to changes in selected starting point values, 3) the sensitivity of the fitted curve to the change in the parameter value and 4) the influence of smoothing the raw data on the sensitivity of the algorithm to changes in selected starting point values.

### Sensitivity of the best fitted Johnson curve to data perturbations and errors

To check the sensitivity of the best fitted Johnson CDF to perturbations on data, we have to decide what type of data perturbation should be considered. Since the mechanism of generating the real cumulative epidemic curve is unknown, and in fact may also be very complex, a problem of fitting a scaled Johnson CDF to discretized and censored data generated from a fixed Johnson distribution was considered. This is performed to check the sensitivity of the numerical algorithm to data perturbation depending on the censoring time point and the sample size. In this case, it is possible to obtain a 95% confidence interval for estimated curve parameters and a 95% confidence area for the curve using parametric bootstrap methods.

The observations were generated from the fixed Johnson cumulative distribution on the time axis using the  $E=111.081$ ,  $\sigma=41.5161$ ,  $S=3.53541$  and  $K=51.35$  parameter values for three sample sizes (total number of infections;  $s_1=20,000$ ;  $s_2=100,000$ ; and  $s_3=500,000$ ). Next, the number of observations on consecutive days was counted and presented as a cumulative curve of observations (cumulative epidemic curve). For each sample generated in this way, the expected value of the number of observations (infections) lies on our fixed Johnson curve, but for each sample, those numbers are slightly different (perturbed). For each generated bootstrap sample, a new Johnson curve was fitted:

$$W_k(t)=s_k * F_{111,41,3.5,51}(t), k=1,2,3 \quad (S7),$$

using only the data up to a certain day. The most interesting time points of censoring are:

- [0,72], before the fastest growth of the cumulative curve (when the inflexion point of the cumulative epidemic curve is not visible)
- [0, 96], just before, but close to the fastest growth of the cumulative curve (very close to the inflexion point of the cumulative epidemic curve)
- [0, 120], after the fastest growth of the cumulative curve (when the inflexion point of the cumulative epidemic curve is visible)

Basic statistics and 95% confidence intervals for parameters of fitted Johnson CDFs are presented in Table S4, and the 95% confidence area for the curve depending on the sample size and censoring point is presented in Fig. S5.

**Table S4.** Basic statistics for estimated parameters of Johnson CDFs depending on sample size and censoring point, showing the sensitivity of the algorithm on data perturbations.

| Sample size | Censoring time point (Observed days) | Parameter | Mean     | SD       | 2.5% Quantile | 97.5% Quantile | Median   | "True" (fixed) value |
|-------------|--------------------------------------|-----------|----------|----------|---------------|----------------|----------|----------------------|
| 20 000      | 72                                   | <i>s</i>  | 37881.19 | 25071.22 | 4003.23       | 87496.8        | 39091.6  | 20000                |
|             |                                      | <i>E</i>  | 119.4992 | 19.20693 | 77.4819       | 173.232        | 116.394  | 111                  |
|             |                                      | $\sigma$  | 57.95834 | 51.12783 | 18.2832       | 189.418        | 34.30355 | 41                   |
|             |                                      | <i>S</i>  | 4.523104 | 4.302203 | 0.189479      | 14.7557        | 2.85422  | 3.5                  |
|             | 96                                   | <i>K</i>  | 202.6737 | 331.5898 | 11.569        | 1172.38        | 47.16355 | 51                   |
|             |                                      | <i>s</i>  | 23314.69 | 10559.55 | 13331.5       | 50881.1        | 19126.8  | 20000                |
|             |                                      | <i>E</i>  | 121.3266 | 31.96079 | 95.0675       | 201.996        | 108.1995 | 111                  |
|             |                                      | $\sigma$  | 63.56083 | 57.09327 | 24.2592       | 205.351        | 39.0404  | 41                   |
|             | 120                                  | <i>S</i>  | 3.787686 | 3.422118 | 0.01          | 10.4233        | 2.92576  | 3.5                  |
|             |                                      | <i>K</i>  | 108.5343 | 143.0198 | 10.9363       | 447.387        | 34.879   | 51                   |
|             |                                      | <i>s</i>  | 20186.68 | 839.1431 | 18576.3       | 21564.7        | 20155.9  | 20000                |
|             |                                      | <i>E</i>  | 111.4958 | 3.522126 | 104.619       | 117.818        | 111.188  | 111                  |
| 100 000     | 72                                   | $\sigma$  | 43.40251 | 6.766972 | 30.7343       | 59.0294        | 42.18555 | 41                   |
|             |                                      | <i>S</i>  | 3.749606 | 1.086217 | 1.47228       | 6.47476        | 3.64146  | 3.5                  |
|             |                                      | <i>K</i>  | 61.52343 | 31.73622 | 15.5444       | 171.337        | 52.465   | 51                   |
|             |                                      | <i>s</i>  | 135414.5 | 74460.42 | 46316.7       | 342713         | 116609.5 | 100000               |
|             | 96                                   | <i>E</i>  | 112.2878 | 8.177635 | 96.8123       | 129.483        | 113.682  | 111                  |
|             |                                      | $\sigma$  | 42.8125  | 11.9638  | 24.3561       | 62.5007        | 38.358   | 41                   |
|             |                                      | <i>S</i>  | 3.638708 | 1.082213 | 1.49648       | 5.35217        | 3.187395 | 3.5                  |
|             |                                      | <i>K</i>  | 60.93808 | 26.46275 | 24.0741       | 125.754        | 56.68605 | 51                   |
|             | 120                                  | <i>s</i>  | 104653.7 | 20769.21 | 77648         | 153699         | 103038.5 | 100000               |
|             |                                      | <i>E</i>  | 112.7787 | 10.67289 | 99.9011       | 142.146        | 111.4815 | 111                  |
|             |                                      | $\sigma$  | 45.03618 | 15.15036 | 29.4428       | 93.5803        | 41.10035 | 41                   |
|             |                                      | <i>S</i>  | 3.474125 | 1.595832 | 1.48679       | 7.11799        | 3.60621  | 3.5                  |
| 500 000     | 72                                   | <i>K</i>  | 57.96746 | 36.18965 | 20.3824       | 178.907        | 53.34795 | 51                   |
|             |                                      | <i>s</i>  | 99619.43 | 1731.655 | 95441.4       | 102761         | 99402.8  | 100000               |
|             |                                      | <i>E</i>  | 110.2936 | 1.434343 | 107.052       | 113.146        | 110.058  | 111                  |
|             |                                      | $\sigma$  | 40.96818 | 2.640203 | 35.116        | 46.6521        | 40.2402  | 41                   |
|             | 96                                   | <i>S</i>  | 3.428888 | 0.430988 | 2.47405       | 4.31246        | 3.33904  | 3.5                  |
|             |                                      | <i>K</i>  | 49.47903 | 10.19388 | 31.0023       | 72.3694        | 48.0193  | 51                   |
|             |                                      | <i>s</i>  | 569561.8 | 261285.3 | 257366        | 1238820        | 472917.5 | 500000               |
|             |                                      | <i>E</i>  | 113.4321 | 9.326847 | 98.1453       | 128.951        | 116.235  | 111                  |
|             | 120                                  | $\sigma$  | 46.24778 | 9.933583 | 29.4899       | 59.1436        | 51.9388  | 41                   |
|             |                                      | <i>S</i>  | 3.813146 | 1.073631 | 1.49465       | 4.94355        | 4.6098   | 3.5                  |
|             |                                      | <i>K</i>  | 60.87341 | 20.50203 | 23.429        | 92.6758        | 69.62885 | 51                   |
|             |                                      | <i>s</i>  | 495591.2 | 52066.23 | 413173        | 592510         | 482470.5 | 500000               |
| 96          | <i>E</i>                             | 110.1882  | 5.428912 | 101.357  | 120.08        | 108.855        | 111      |                      |
|             | $\sigma$                             | 41.27961  | 7.375042 | 30.0752  | 54.3512       | 39.4843        | 41       |                      |
|             | <i>S</i>                             | 3.356778  | 0.930904 | 1.56296  | 4.86677       | 3.21771        | 3.5      |                      |
|             | <i>K</i>                             | 50.55106  | 18.27404 | 24.0876  | 87.1048       | 46.27765       | 51       |                      |
| 120         | <i>s</i>                             | 499632.8  | 3509.042 | 493599   | 506644        | 499467         | 500000   |                      |
|             | <i>E</i>                             | 110.5131  | 0.590449 | 109.498  | 111.645       | 110.483        | 111      |                      |
|             | $\sigma$                             | 41.39574  | 1.150893 | 39.2865  | 43.407        | 41.2768        | 41       |                      |
|             | <i>S</i>                             | 3.506785  | 0.193949 | 3.1271   | 3.83708       | 3.49625        | 3.5      |                      |
|             |                                      | <i>K</i>  | 50.75436 | 4.64953  | 41.6607       | 58.8116        | 50.7473  | 51                   |

The results showed that the fitted Johnson CDF was very sensitive to data perturbation and errors, but only when it was fitted using just 30% of the available data (72 days of the ongoing infection wave, far before the cumulative epidemic curve inflexion point). When 40% of the available data (96 days of the ongoing infection wave, just before the cumulative epidemic curve inflexion point) was used to fit the Johnson CDF, its sensitivity to data perturbation greatly decreased, while it was hardly sensitive to data perturbation when 50% of the data (120 days of the ongoing wave, after the inflexion point of the cumulative epidemic curve) was used in the estimation (Table S4; Fig. S5)

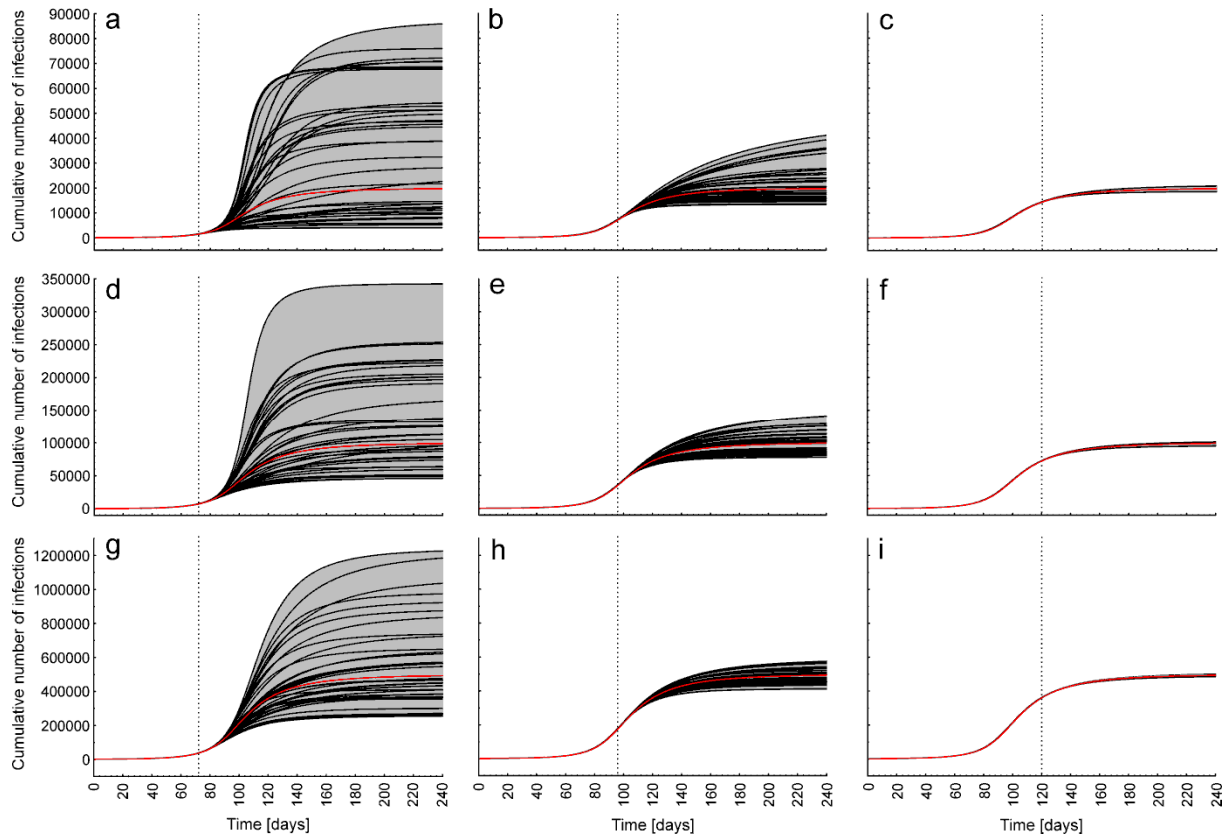

**Figure S5.** Confidence areas (95%; grey) for Johnson CDF (red line) showing the sensitivity of the numerical algorithm to data perturbation, depending on the sample size and censoring point: (a) sample size = 20,000, censoring point at 72<sup>nd</sup> day; (b) sample size = 20,000, censoring point at 96<sup>th</sup> day; (c) sample size = 20,000, censoring point at 120<sup>th</sup> day; (d) sample size = 100,000, censoring point at 72<sup>nd</sup> day; (e) sample size = 100,000, censoring point at 96<sup>th</sup> day; (f) sample size = 100,000, censoring point at 120<sup>th</sup> day; (g) sample size = 500,000, censoring point at 72<sup>nd</sup> day; (h) sample size = 500,000, censoring point at 96<sup>th</sup> day; and (i) sample size = 500,000, censoring point at 120<sup>th</sup> day.

### Sensitivity analysis of the algorithm used to changes in selected starting point values

The sensitivity of the algorithm to the changes in the values of the selected starting points was determined on the data from Afghanistan using the parameters of the best fitted Johnson CDF. Default values for the starting points were set to  $s=0.103$ ,  $E=111$ ,  $\sigma=41$ ,  $S=3.5$ , and  $K=51$ . Then, the sensitivity of the algorithm to the changes in the value of a given starting point was tested by performing multiple fitting, each time changing the value of a given starting point, while the values of the other starting points were set at their default values, to check if the final value of the estimated parameters would change, depending on the value of the starting point. The results of the sensitivity analysis of the algorithm used to the changes in values of selected starting points are presented in Table S5.

The results showed that the algorithm used is hardly sensitive to the selection of the starting point values. The only cases when the estimated curve was not correctly fitted to the data, which is visible by much lower  $R^2$  values, were when the starting point for the  $E$  parameter was set at 250 and 300, which is over 2 times higher than its optimal value, and when the  $S$  parameter starting value was set to 0 (Table S5).

**Table S5.** The results of the sensitivity analysis of the algorithm used to the changes in values of selected starting points.

| Parameter tested | Starting point value | R <sup>2</sup> | Estimated parameters |          |          |          |          |
|------------------|----------------------|----------------|----------------------|----------|----------|----------|----------|
|                  |                      |                | <i>s</i>             | <i>E</i> | $\sigma$ | <i>S</i> | <i>K</i> |
| <i>s</i>         | 0.01                 | 0.99979638     | 0.102767             | 111.081  | 41.5161  | 3.53541  | 51.35    |
|                  | 0.02                 | 0.99979638     | 0.102767             | 111.081  | 41.5161  | 3.53541  | 51.35    |
|                  | 0.033                | 0.99979638     | 0.102767             | 111.081  | 41.5161  | 3.53541  | 51.35    |
|                  | 0.05                 | 0.99979638     | 0.102767             | 111.081  | 41.5161  | 3.53541  | 51.35    |
|                  | 0.103                | 0.99979638     | 0.102767             | 111.081  | 41.5161  | 3.53541  | 51.35    |
|                  | 0.2                  | 0.99979638     | 0.102767             | 111.081  | 41.5161  | 3.53541  | 51.35    |
|                  | 0.5                  | 0.99979638     | 0.102767             | 111.081  | 41.5161  | 3.53541  | 51.35    |
|                  | 1.0                  | 0.99979638     | 0.102767             | 111.081  | 41.5161  | 3.53541  | 51.35    |
| <i>E</i>         | 11                   | 0.99979638     | 0.102767             | 111.081  | 41.5161  | 3.5354   | 51.35    |
|                  | 22                   | 0.99979638     | 0.102767             | 111.081  | 41.5161  | 3.5354   | 51.35    |
|                  | 37                   | 0.99979638     | 0.102767             | 111.081  | 41.5161  | 3.5354   | 51.35    |
|                  | 56                   | 0.99979638     | 0.102767             | 111.081  | 41.5161  | 3.5354   | 51.35    |
|                  | 60                   | 0.99979638     | 0.102767             | 111.081  | 41.5161  | 3.5354   | 51.35    |
|                  | 70                   | 0.99979638     | 0.102767             | 111.081  | 41.5161  | 3.53541  | 51.35    |
|                  | 80                   | 0.99979638     | 0.102767             | 111.081  | 41.5161  | 3.5354   | 51.35    |
|                  | 90                   | 0.99979638     | 0.102767             | 111.081  | 41.5161  | 3.53541  | 51.35    |
|                  | 100                  | 0.99979638     | 0.102767             | 111.081  | 41.5161  | 3.5354   | 51.35    |
|                  | 111                  | 0.99979638     | 0.102767             | 111.081  | 41.5161  | 3.53541  | 51.35    |
|                  | 120                  | 0.99979638     | 0.102767             | 108.619  | 41.5161  | 3.53541  | 51.3501  |
|                  | 130                  | 0.99979638     | 0.102767             | 108.619  | 41.5161  | 3.53541  | 51.35    |
|                  | 140                  | 0.99979638     | 0.102767             | 108.619  | 41.5161  | 3.53541  | 51.35    |
|                  | 150                  | 0.99979638     | 0.102767             | 108.619  | 41.5161  | 3.5354   | 51.35    |
|                  | 200                  | 0.99979638     | 0.102767             | 111.081  | 41.5161  | 3.53541  | 51.35    |
| 250              | 0.91969016           | 0.192534       | 222.367              | 178.257  | 2.54486  | 13.3597  |          |
| 300              | 0.89827058           | 0.249301       | 268.221              | 177.402  | 1.18206  | 1.39523  |          |
| $\sigma$         | 10                   | 0.99979638     | 0.102767             | 111.081  | 41.5161  | 3.5354   | 51.35    |
|                  | 20                   | 0.99979638     | 0.102767             | 111.081  | 41.5161  | 3.53541  | 51.35    |
|                  | 30                   | 0.99979638     | 0.102767             | 111.081  | 41.5161  | 3.53541  | 51.35    |
|                  | 41                   | 0.99979638     | 0.102767             | 111.081  | 41.5161  | 3.53541  | 51.35    |
|                  | 50                   | 0.99979638     | 0.102767             | 111.081  | 41.5161  | 3.53541  | 51.35    |
|                  | 60                   | 0.99979638     | 0.102767             | 111.081  | 41.5161  | 3.53541  | 51.35    |
|                  | 70                   | 0.99979638     | 0.102767             | 111.081  | 41.5161  | 3.5354   | 51.35    |
|                  | 80                   | 0.99979638     | 0.102767             | 111.081  | 41.5161  | 3.53541  | 51.35    |
|                  | 90                   | 0.99979638     | 0.102767             | 111.081  | 41.5161  | 3.53541  | 51.35    |
|                  | 100                  | 0.99979638     | 0.102767             | 111.081  | 41.5161  | 3.53541  | 51.3501  |
|                  | 300                  | 0.99979638     | 0.102767             | 111.081  | 41.5161  | 3.53541  | 51.3501  |
|                  | <i>S</i>             | -4             | 0.99979638           | 0.102767 | 111.081  | 41.5161  | 3.53541  |
| -3               |                      | 0.99979638     | 0.102767             | 111.081  | 41.5161  | 3.53541  | 51.35    |
| -2               |                      | 0.99979638     | 0.102767             | 111.081  | 41.5161  | 3.5354   | 51.35    |
| -1               |                      | 0.99979638     | 0.102767             | 111.081  | 41.5161  | 3.53541  | 51.3501  |
| 0                |                      | 0.99857501     | 0.0990974            | 104.753  | 28.7334  | 0        | 4.68877  |
| 1                |                      | 0.99979638     | 0.102767             | 111.081  | 41.5161  | 3.53541  | 51.35    |
| 2                |                      | 0.99979638     | 0.102767             | 111.081  | 41.5161  | 3.53541  | 51.35    |
| 3                |                      | 0.99979638     | 0.102767             | 111.081  | 41.5161  | 3.53541  | 51.35    |
| 3.5              |                      | 0.99979638     | 0.102767             | 111.081  | 41.5161  | 3.53541  | 51.35    |
| 4                |                      | 0.99979638     | 0.102767             | 111.081  | 41.5161  | 3.53541  | 51.3501  |
| <i>K</i>         | 15                   | 0.99979638     | 0.102767             | 111.081  | 41.5161  | 3.53541  | 51.3501  |
|                  | 30                   | 0.99979638     | 0.102767             | 111.081  | 41.5161  | 3.53541  | 51.35    |
|                  | 40                   | 0.99979638     | 0.102767             | 111.081  | 41.5161  | 3.53541  | 51.3501  |
|                  | 51                   | 0.99979638     | 0.102767             | 111.081  | 41.5161  | 3.53541  | 51.35    |
|                  | 60                   | 0.99979638     | 0.102767             | 111.081  | 41.5161  | 3.53541  | 51.35    |
|                  | 70                   | 0.99979638     | 0.102767             | 111.081  | 41.5161  | 3.53541  | 51.35    |
|                  | 80                   | 0.99979638     | 0.102767             | 111.081  | 41.5161  | 3.53541  | 51.35    |
|                  | 100                  | 0.99979638     | 0.102767             | 111.081  | 41.5161  | 3.53541  | 51.3501  |

### Sensitivity of the fitted curve to the change in the parameter value

The sensitivity of the fitted curve to the changes in the value of parameters was determined on the data from Afghanistan. The default values for the parameters were set to  $s=0.102767$ ,  $E=111.081$ ,  $\sigma=41.5161$ ,  $S=3.53541$ , and  $K=51.3501$ . Then, the sensitivity of the fitted curve to the changes in the value of a given parameter was tested by calculating the coefficients of determination ( $R^2$ ), each time changing the value of a given parameter, while the values of the other parameters were set at their default values to determine how the  $R^2$  will change, depending on the value of the given parameter. The results of the sensitivity analysis of the algorithm used to the changes in values of selected starting points are presented in Table S6.

The Johnson CDF curve fitted to the cumulative epidemic wave from Afghanistan was the most sensitive to the changes in the values of the  $s$  and  $E$  parameters. Changing the value of these parameters by more than  $\pm 5\%$  resulted in a relatively high decrease in the  $R^2$  value, whereas for other parameters, the  $R^2$  value was still higher than 0.99, even after changing the value of the parameter by  $\pm 25\%$  (Table S6).

**Table S6.** The results of the sensitivity analysis of the Johnson CDF (presented as  $R^2$  values) depending on the percentage change in the value of a given parameter.

|          | Percentage change in the parameter value |          |          |          |          |        |          |          |          |          |          |
|----------|------------------------------------------|----------|----------|----------|----------|--------|----------|----------|----------|----------|----------|
|          | -25%                                     | -20%     | -15%     | -10%     | -5%      | 0%     | +5%      | +10%     | +15%     | +20%     | +25%     |
| $s$      | 0.826486                                 | 0.887229 | 0.934915 | 0.969544 | 0.991115 | 0.9998 | 0.995086 | 0.977486 | 0.946829 | 0.903114 | 0.846342 |
| $E$      | 0.812395                                 | 0.876832 | 0.929151 | 0.967984 | 0.991716 | 0.9998 | 0.991697 | 0.967713 | 0.928671 | 0.875900 | 0.811015 |
| $\sigma$ | 0.993674                                 | 0.995989 | 0.997715 | 0.998895 | 0.999572 | 0.9998 | 0.999556 | 0.998931 | 0.997932 | 0.996587 | 0.994920 |
| $S$      | 0.998641                                 | 0.998989 | 0.999292 | 0.999542 | 0.999713 | 0.9998 | 0.999699 | 0.999396 | 0.998744 | 0.997497 | 0.995096 |
| $K$      | 0.999006                                 | 0.999353 | 0.999569 | 0.999696 | 0.999761 | 0.9998 | 0.999767 | 0.999728 | 0.999671 | 0.999600 | 0.999517 |

### The influence of smoothing the raw data on the sensitivity of the algorithm to changes in selected starting point values

The sensitivity of the algorithm to the changes in the values of the selected starting points was determined on the raw and smoothed (5-day moving average) data from Switzerland using the parameters of the best fitted Johnson CDF. Default values for the starting points were set to  $s_1=0.103$ ,  $E_1=111$ ,  $\sigma_1=41$ ,  $S_1=3.5$ , and  $K_1=51$  for the first wave of infections, to  $s_2=0.103$ ,  $E_2=111$ ,  $\sigma_2=41$ ,  $S_2=3.5$ , and  $K_2=51$  for the second wave of infections, and to  $s_3=0.103$ ,  $E_3=111$ ,  $\sigma_3=41$ ,  $S_3=3.5$ , and  $K_3=51$  for the third wave of infections. Then, the sensitivity of the algorithm to the changes in the value of an  $E_3$  parameter was tested by performing multiple fitting, each time changing the value of an  $E_3$  parameter starting point, while the values of the other starting points were set at their default values to check if the final value of the estimated parameters would change, depending on the value of the starting point and smoothing the data.

The results showed that when fitting Johnson CDF to the ongoing wave, smoothing the raw data makes the numerical algorithm less sensitive to the changes in the values of the selected starting points (Table S7).

**Table S7.** The results of the sensitivity analysis of the used algorithm to the changes in values of the selected starting point ( $E_3$ ), performed on nonsmoothed and smoothed (5-days moving average) data from Switzerland.

| Data used                           | Wave number | Starting point value for $E$ | Estimated parameters |         |          |            |         | $R^2$  |
|-------------------------------------|-------------|------------------------------|----------------------|---------|----------|------------|---------|--------|
|                                     |             |                              | $s$                  | $E$     | $\sigma$ | $S$        | $K$     |        |
| Nonsmoothed                         | 1           | 35                           | 0.346415             | 36.8513 | 12.9059  | 1.09336    | 2.52266 | 0.9997 |
|                                     | 2           | 209                          | 0.443446             | 209.623 | 54.0862  | 0.257488   | 5.1684  |        |
|                                     | 3           | 232                          | 0.220582             | 232.239 | 7.01495  | 0.00727957 | 108.8   |        |
|                                     | 1           | 35                           | 0.345336             | 36.8149 | 12.7772  | 1.06679    | 2.34056 | 0.9997 |
|                                     | 2           | 209                          | 0.444303             | 209.523 | 56.1002  | 0.315109   | 6.87226 |        |
|                                     | 3           | 235                          | 0.220408             | 232.269 | 6.14191  | 0.0966419  | 44.342  |        |
|                                     | 1           | 35                           | 0.349781             | 31.417  | 12.0022  | 0.347605   | 51.7844 | 0.9794 |
|                                     | 2           | 209                          | 0.451029             | 208.885 | 51.5855  | 0.952251   | 77.5894 |        |
|                                     | 3           | 240                          | 0.272046             | 239.068 | 5.64267  | 0.750697   | 1.02849 |        |
| Smoothed<br>(5-days moving average) | 1           | 35                           | 0.346704             | 36.8503 | 13.0004  | 1.07072    | 2.45471 | 0.9997 |
|                                     | 2           | 209                          | 0.450417             | 209.331 | 52.0351  | 0.07506    | 4.15864 |        |
|                                     | 3           | 232                          | 0.207681             | 232.148 | 4.75103  | 0.00360    | 4.04213 |        |
|                                     | 1           | 35                           | 0.346591             | 36.8564 | 12.9996  | 1.07328    | 2.46237 | 0.9997 |
|                                     | 2           | 209                          | 0.442682             | 208.922 | 52.9049  | 0.161177   | 4.76164 |        |
|                                     | 3           | 235                          | 0.21492              | 232.182 | 5.53929  | 0.0414654  | 11.0521 |        |
|                                     | 1           | 35                           | 0.347763             | 36.8964 | 13.14    | 1.0947     | 2.64168 | 0.9997 |
|                                     | 2           | 209                          | 0.454353             | 209.671 | 50.1219  | 0.000005   | 3.03358 |        |
|                                     | 3           | 240                          | 0.204025             | 232.143 | 4.56713  | 0.00146299 | 3.19946 |        |

## Fitted Johnson cumulative density functions

Johnson cumulative density functions fitted to the data obtained for 80 countries on six continents are shown in Figs. S6-S11 (Africa, Fig. S6; Asia, Fig. S7; Europe, Fig. S8; North America, Fig. S9; Oceania, Fig. S10; and South America, Fig. S11). The formulas and  $R^2$  values of each fitted curve are listed in Table S8. The basic parameters of the first infection wave dynamics ( $S$ ,  $P_{inf}$ ,  $Q_{2.5\%}$ ,  $Q_{50\%}$ ,  $Q_{97.5\%}$ ,  $M$ ,  $t_i$ ,  $t_d$ ,  $T$ , and  $A$ ) calculated using Johnson CDFs fitted to the data obtained for 80 countries on six continents are listed in Table S9.

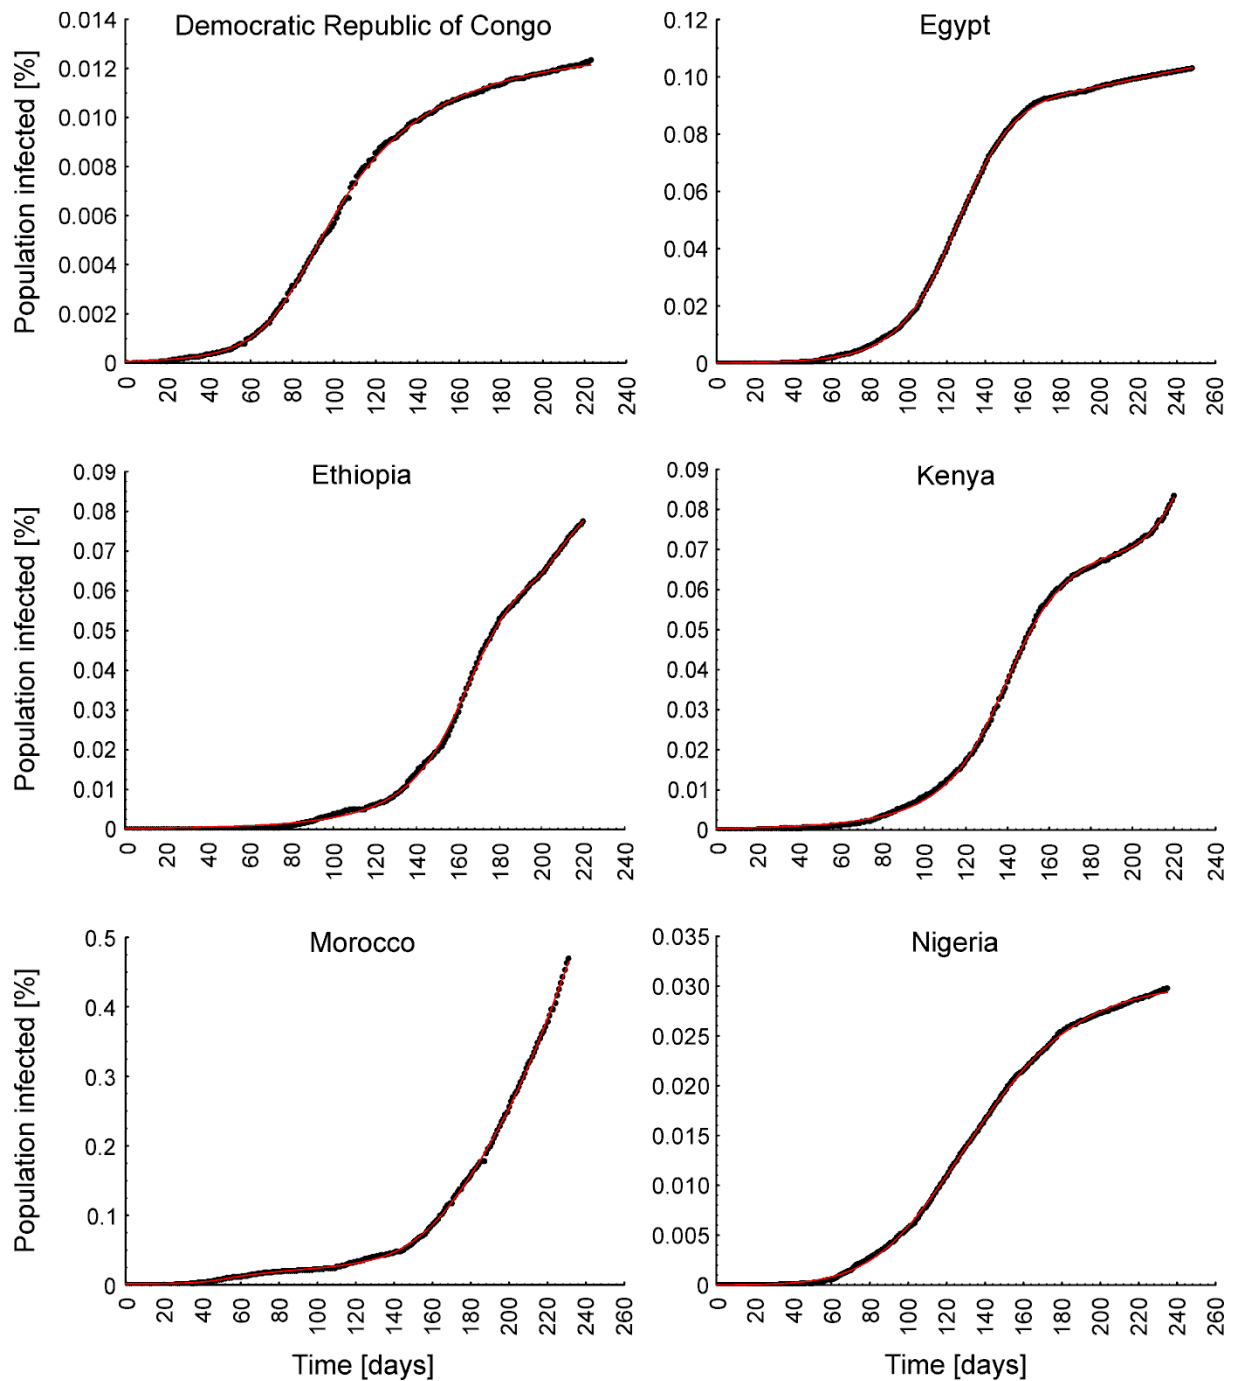

**Figure S6.** Johnson cumulative density functions (red lines) fitted to the data on COVID-19 trajectories (cumulative epidemic curves) in African countries.



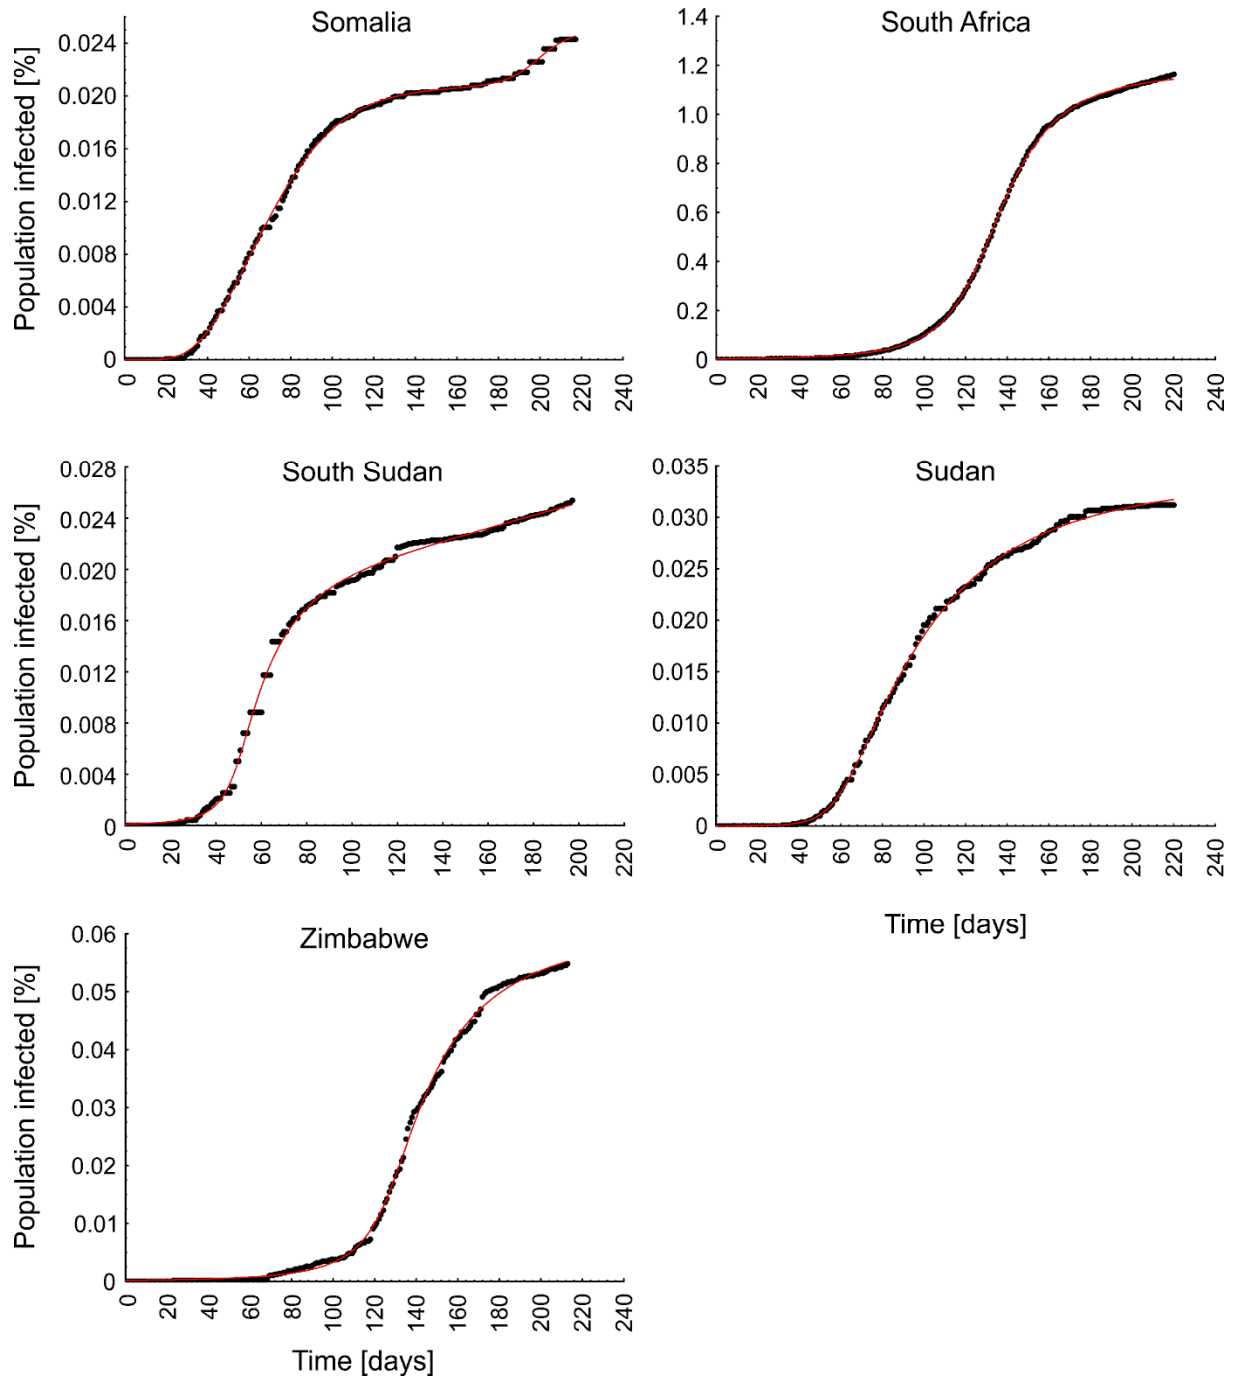

**Figure S6 continued.** Johnson cumulative density functions (red lines) fitted to the data on COVID-19 trajectories (cumulative epidemic curves) in African countries.

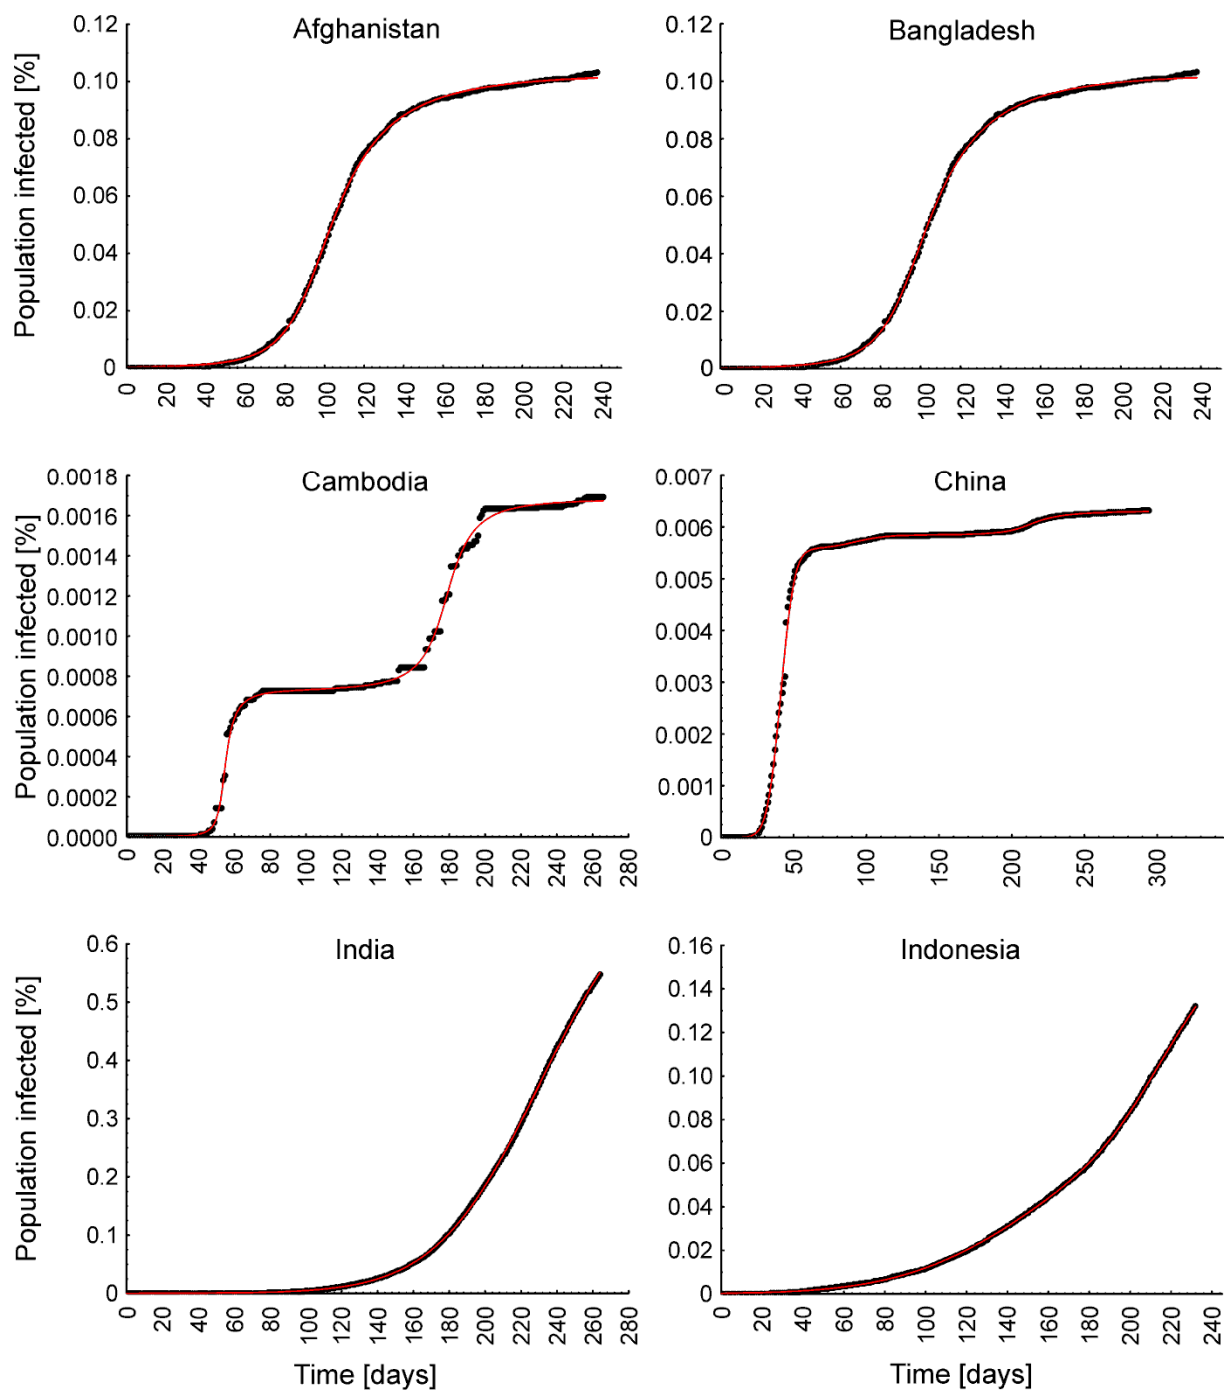

**Figure S7.** Johnson cumulative density functions (red lines) fitted to the data on COVID-19 trajectories (cumulative epidemic curves) in Asian countries.

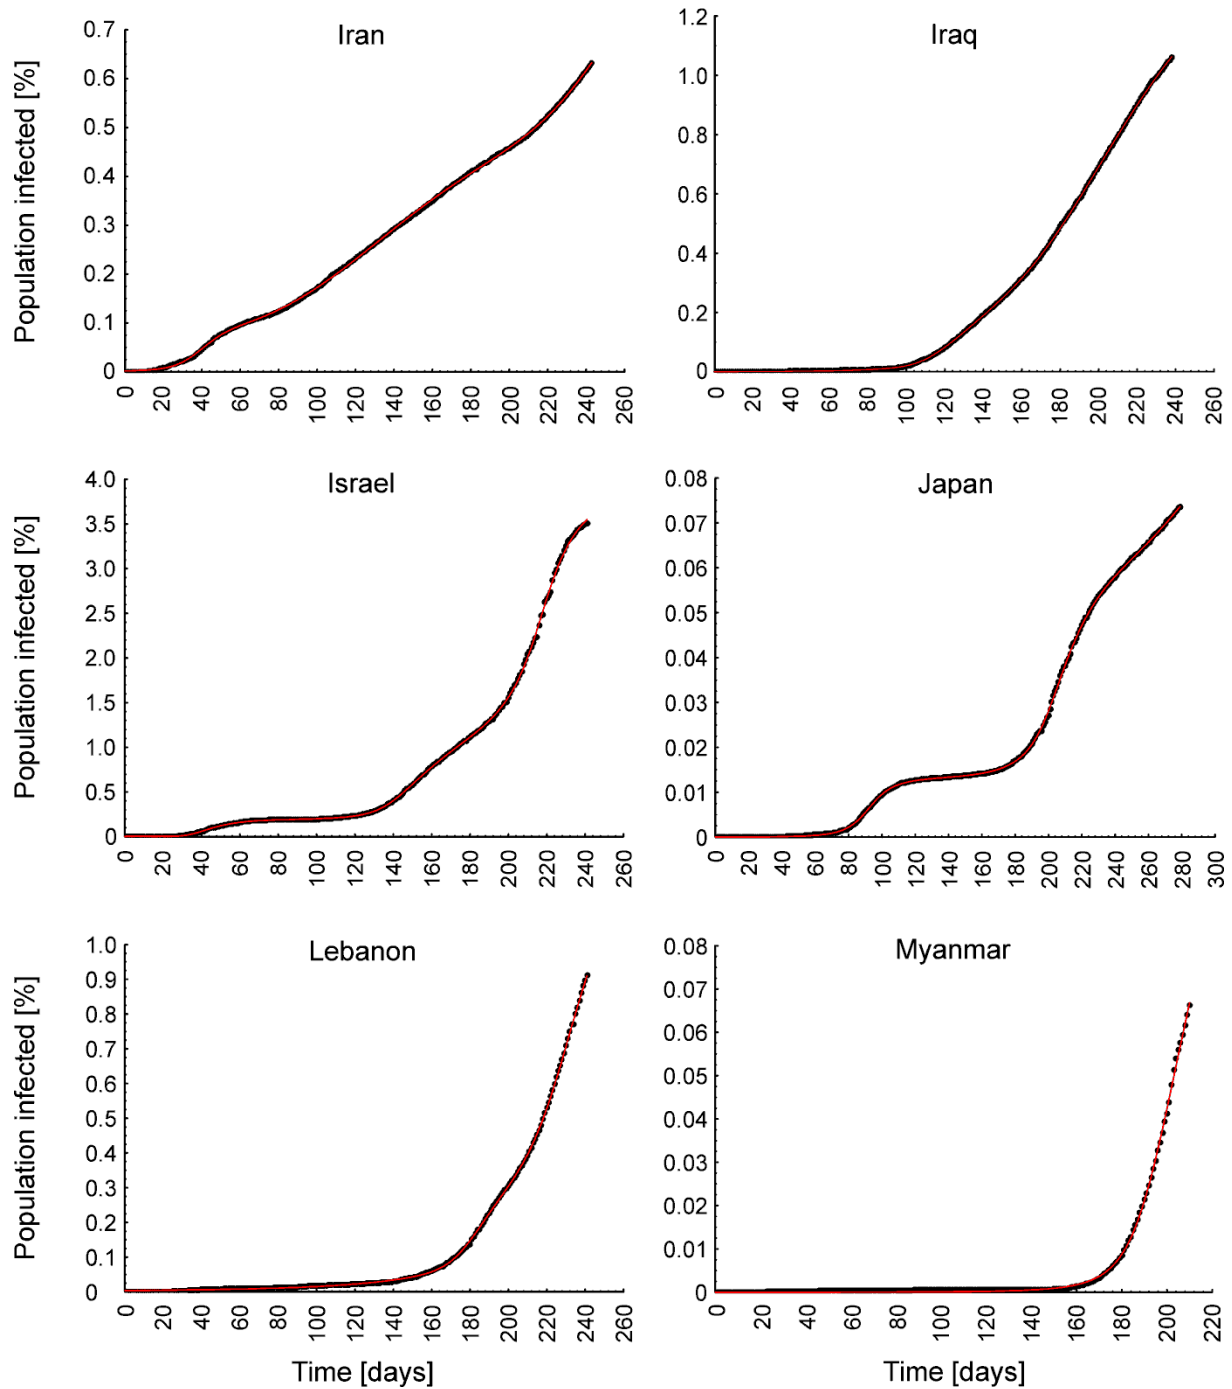

**Figure S7 continued.** Johnson cumulative density functions (red lines) fitted to the data on COVID-19 trajectories (cumulative epidemic curves) in Asian countries.

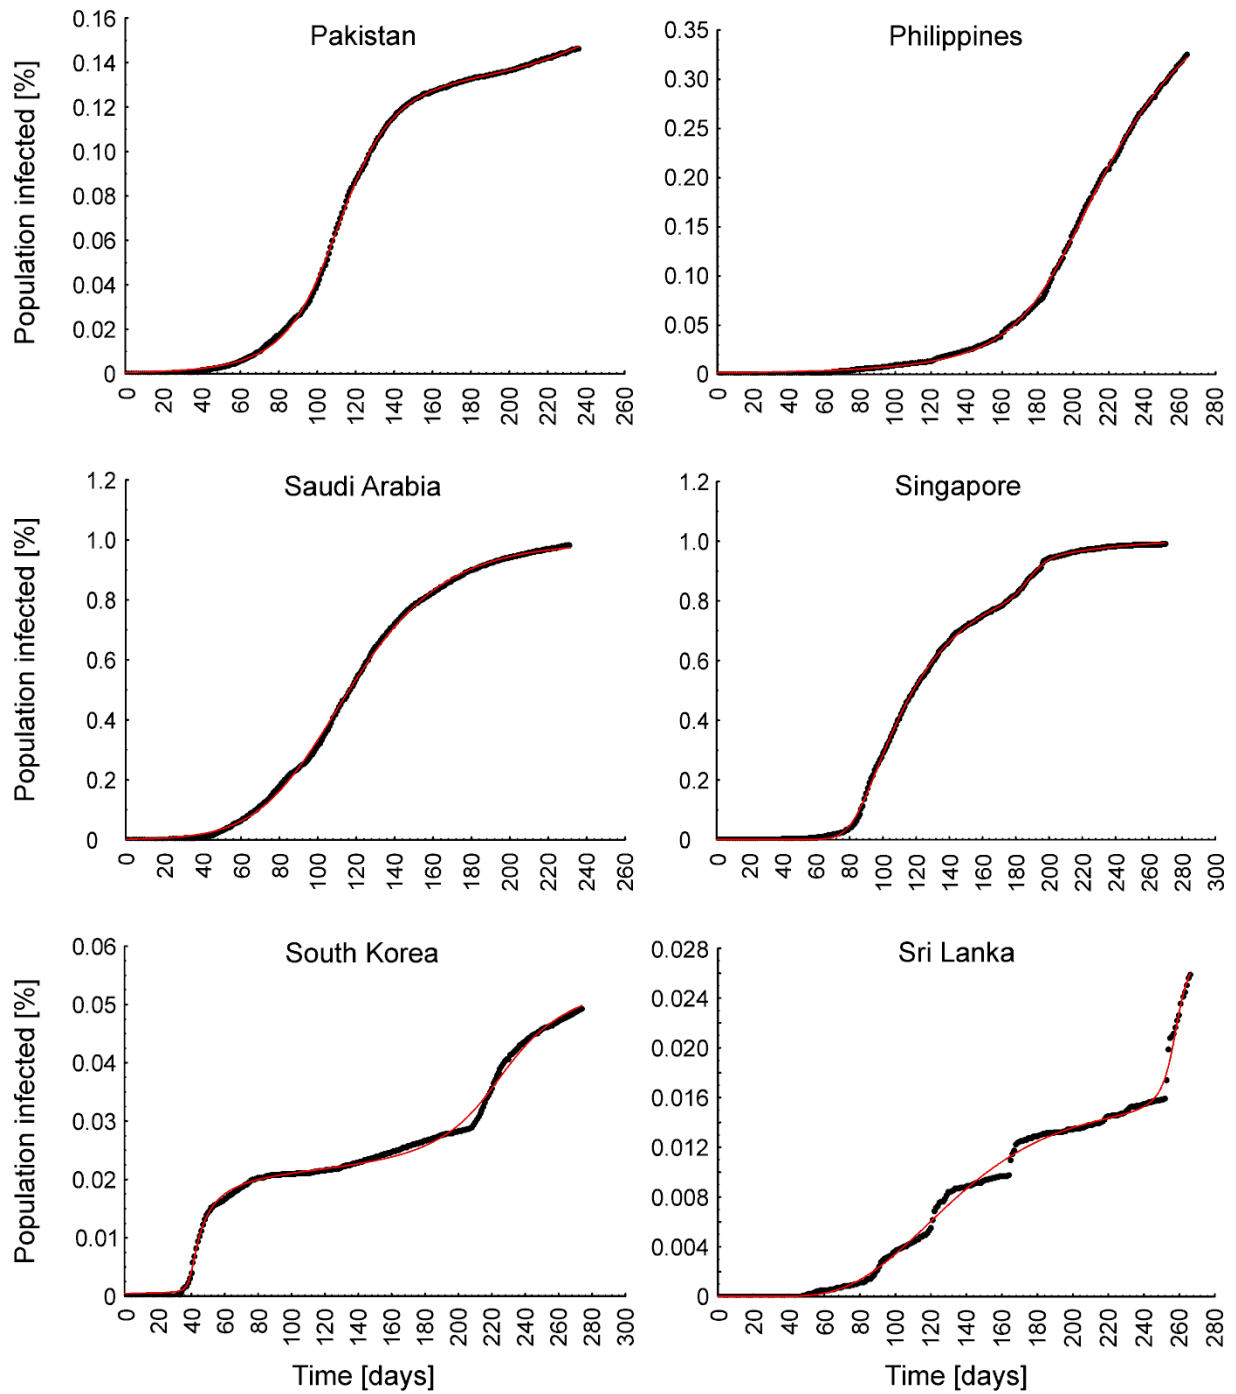

**Figure S7 continued.** Johnson cumulative density functions (red lines) fitted to the data on COVID-19 trajectories (cumulative epidemic curves) in Asian countries.

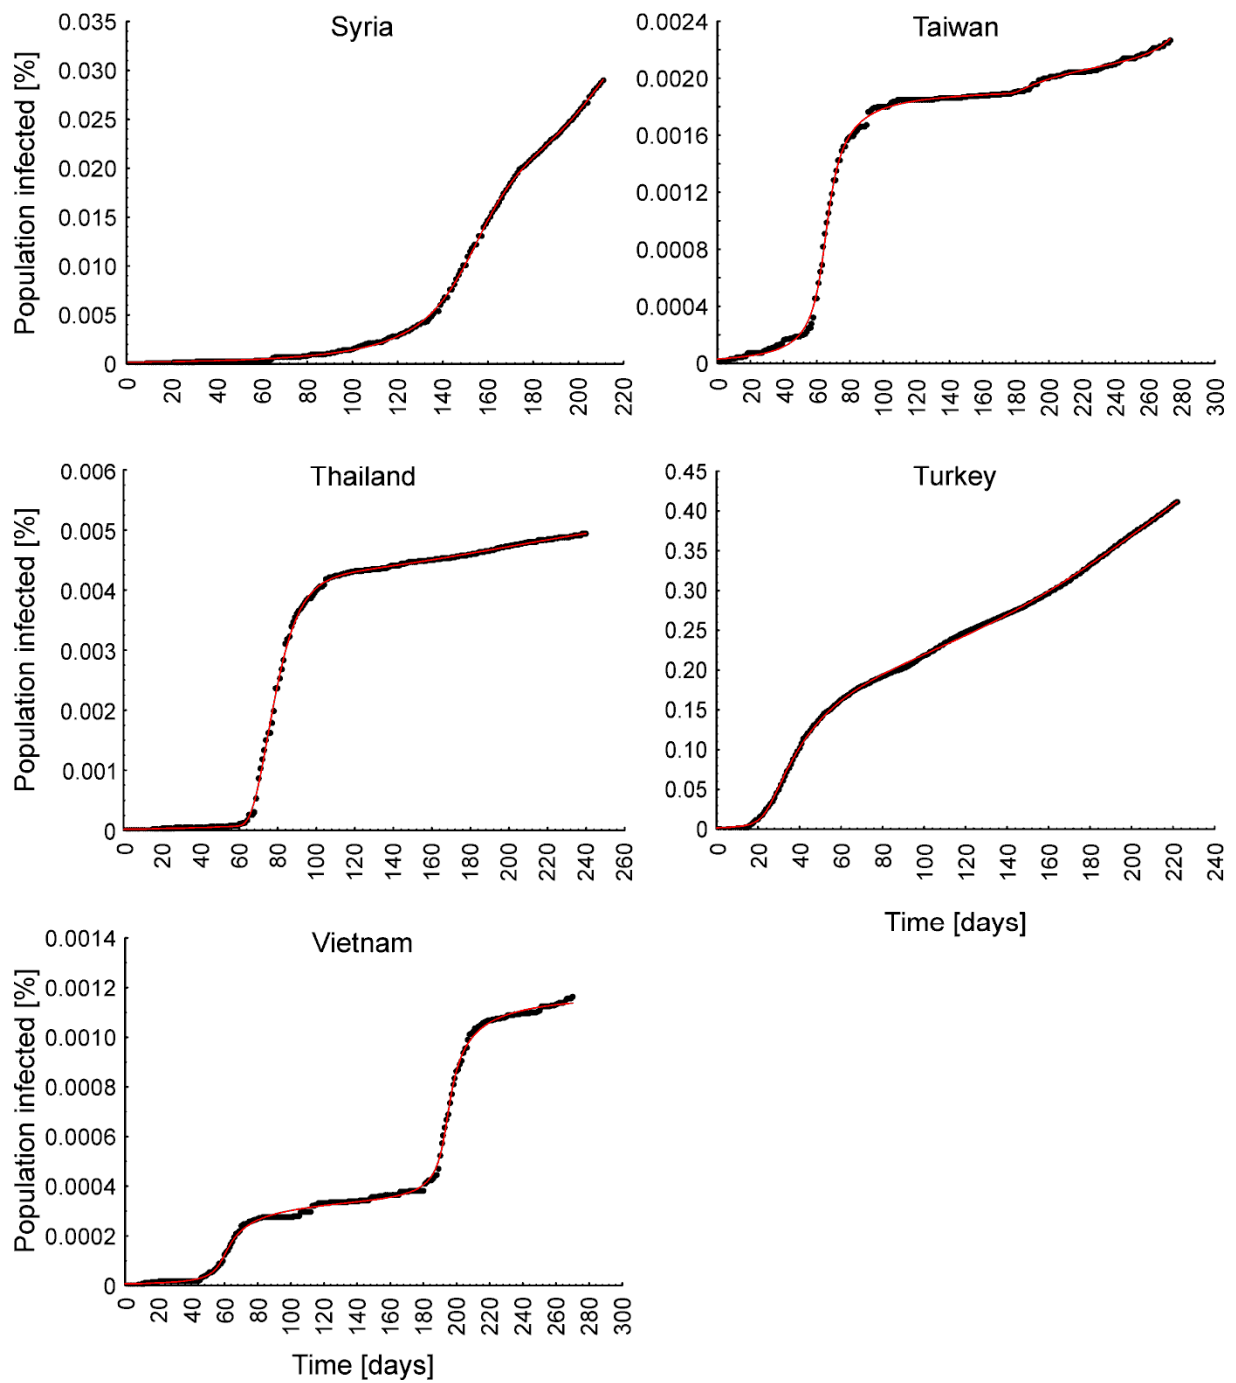

**Figure S7 continued.** Johnson cumulative density functions (red lines) fitted to the data on COVID-19 trajectories (cumulative epidemic curves) in Asian countries.

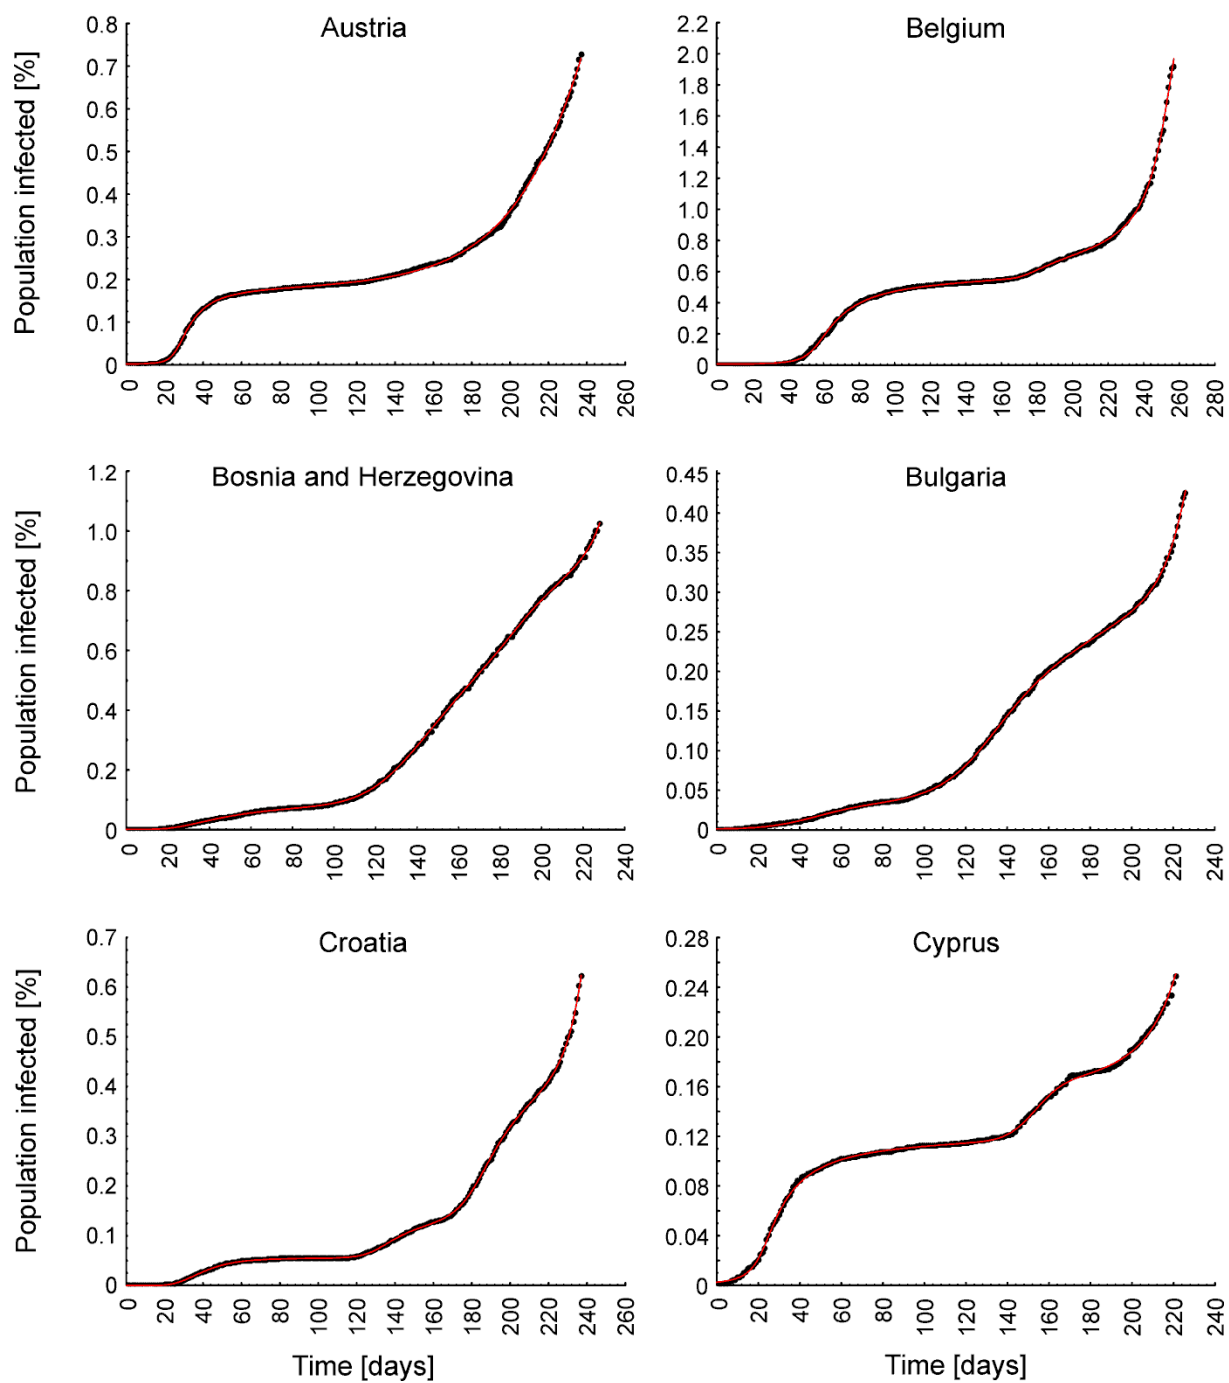

**Figure S8.** Johnson cumulative density functions (red lines) fitted to the data on COVID-19 trajectories (cumulative epidemic curves) in European countries.

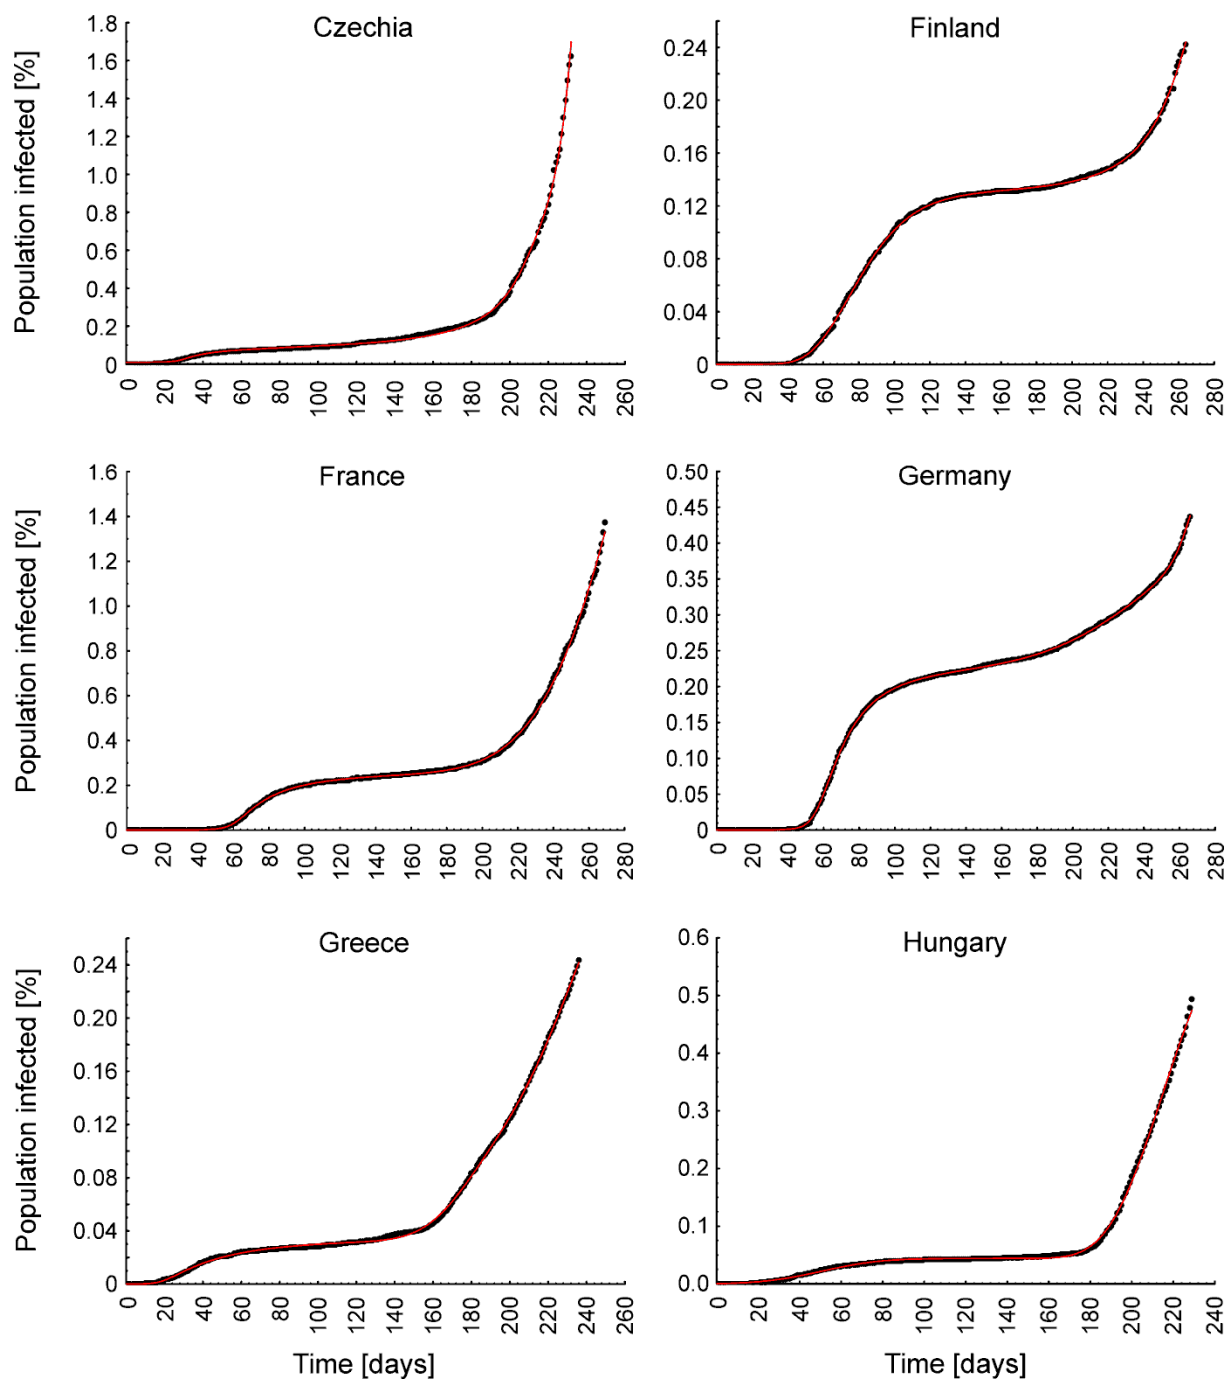

**Figure S8 continued.** Johnson cumulative density functions (red lines) fitted to the data on COVID-19 trajectories (cumulative epidemic curves) in European countries.

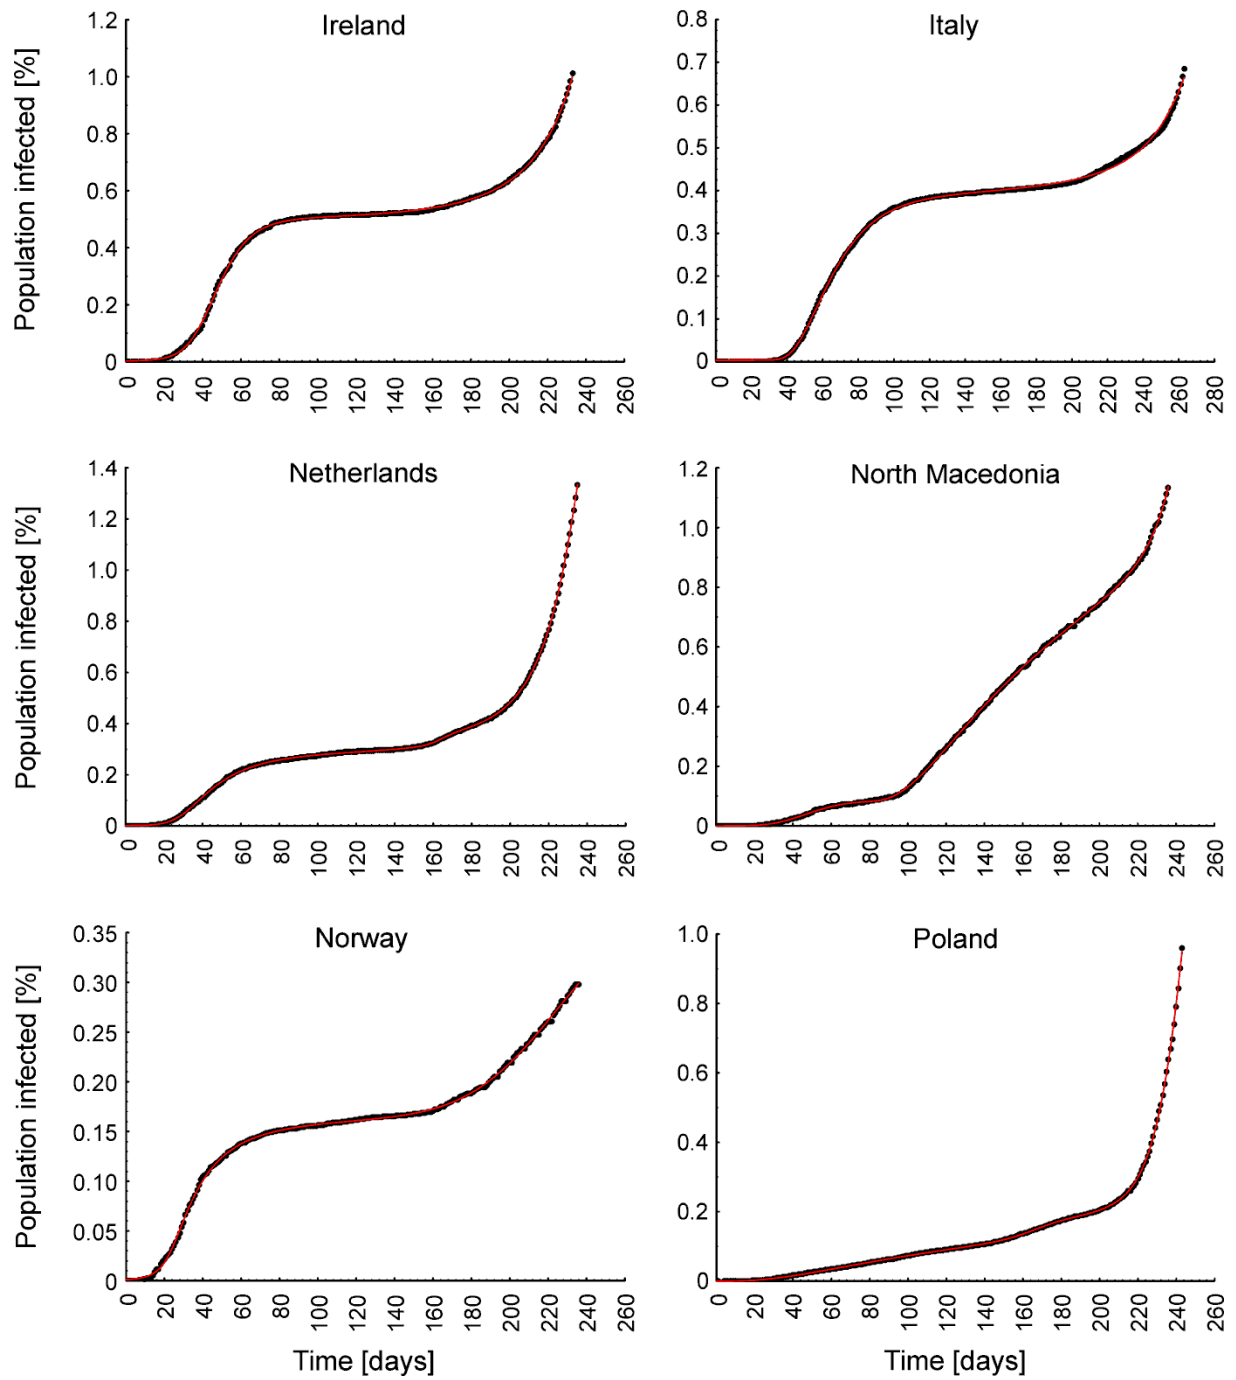

**Figure S8 continued.** Johnson cumulative density functions (red lines) fitted to the data on COVID-19 trajectories (cumulative epidemic curves) in European countries.



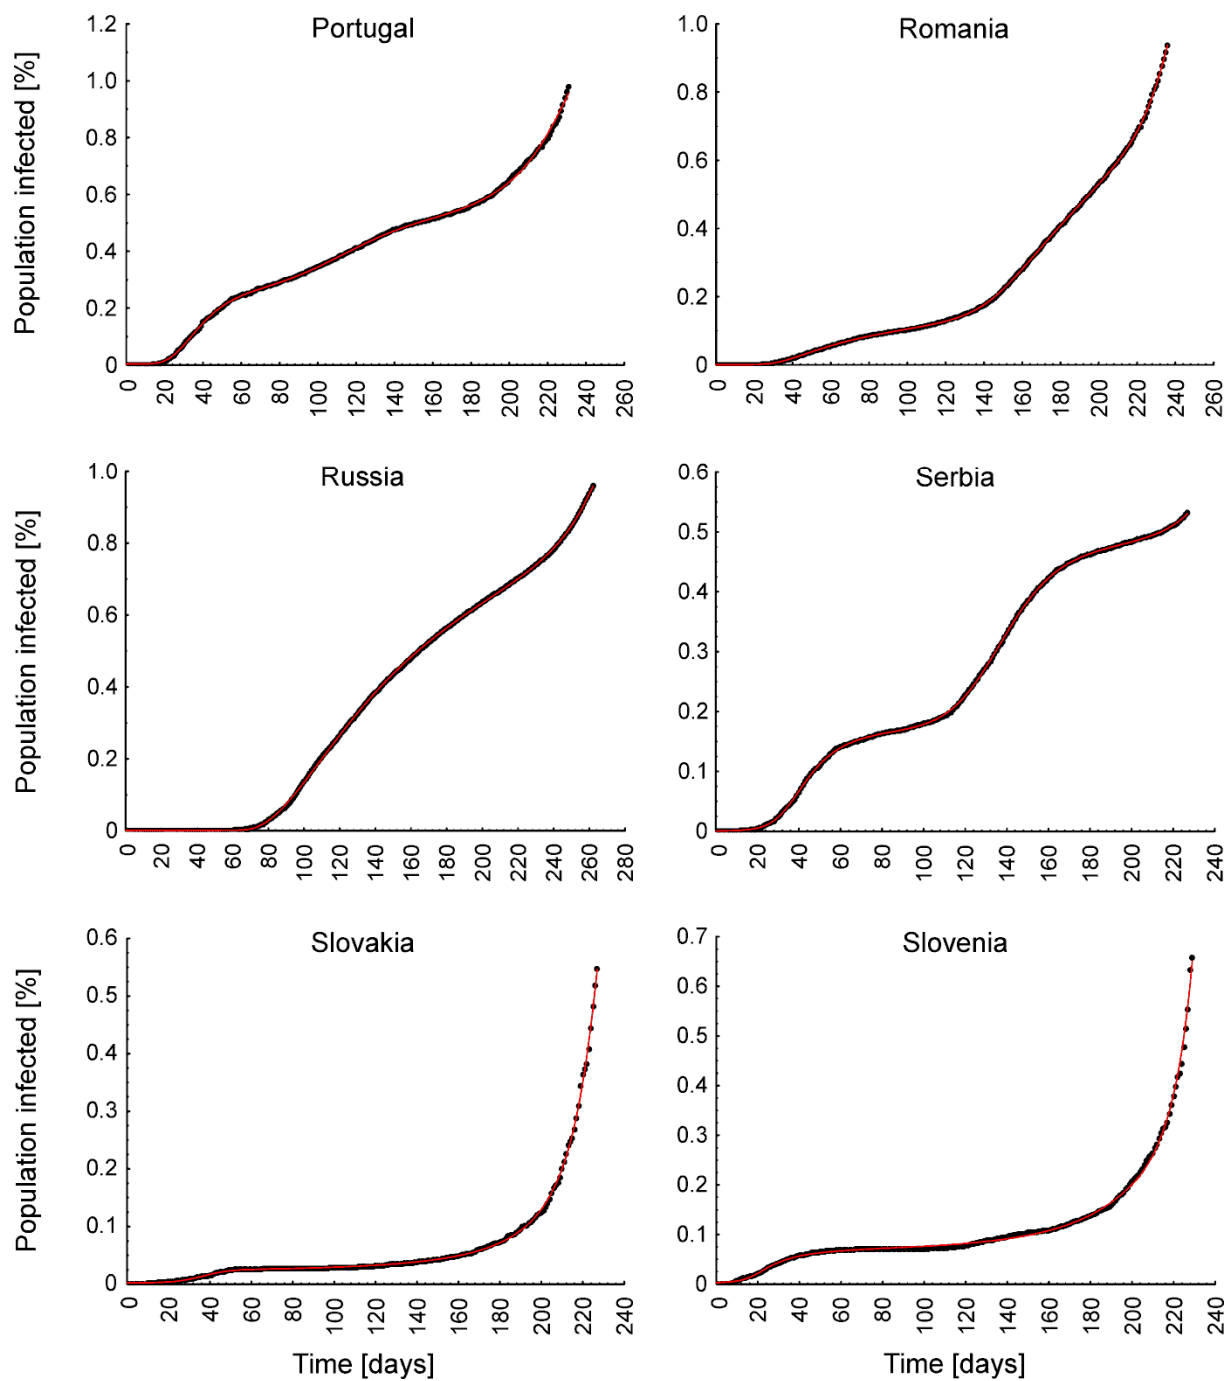

**Figure S8 continued.** Johnson cumulative density functions (red lines) fitted to the data on COVID-19 trajectories (cumulative epidemic curves) in European countries.

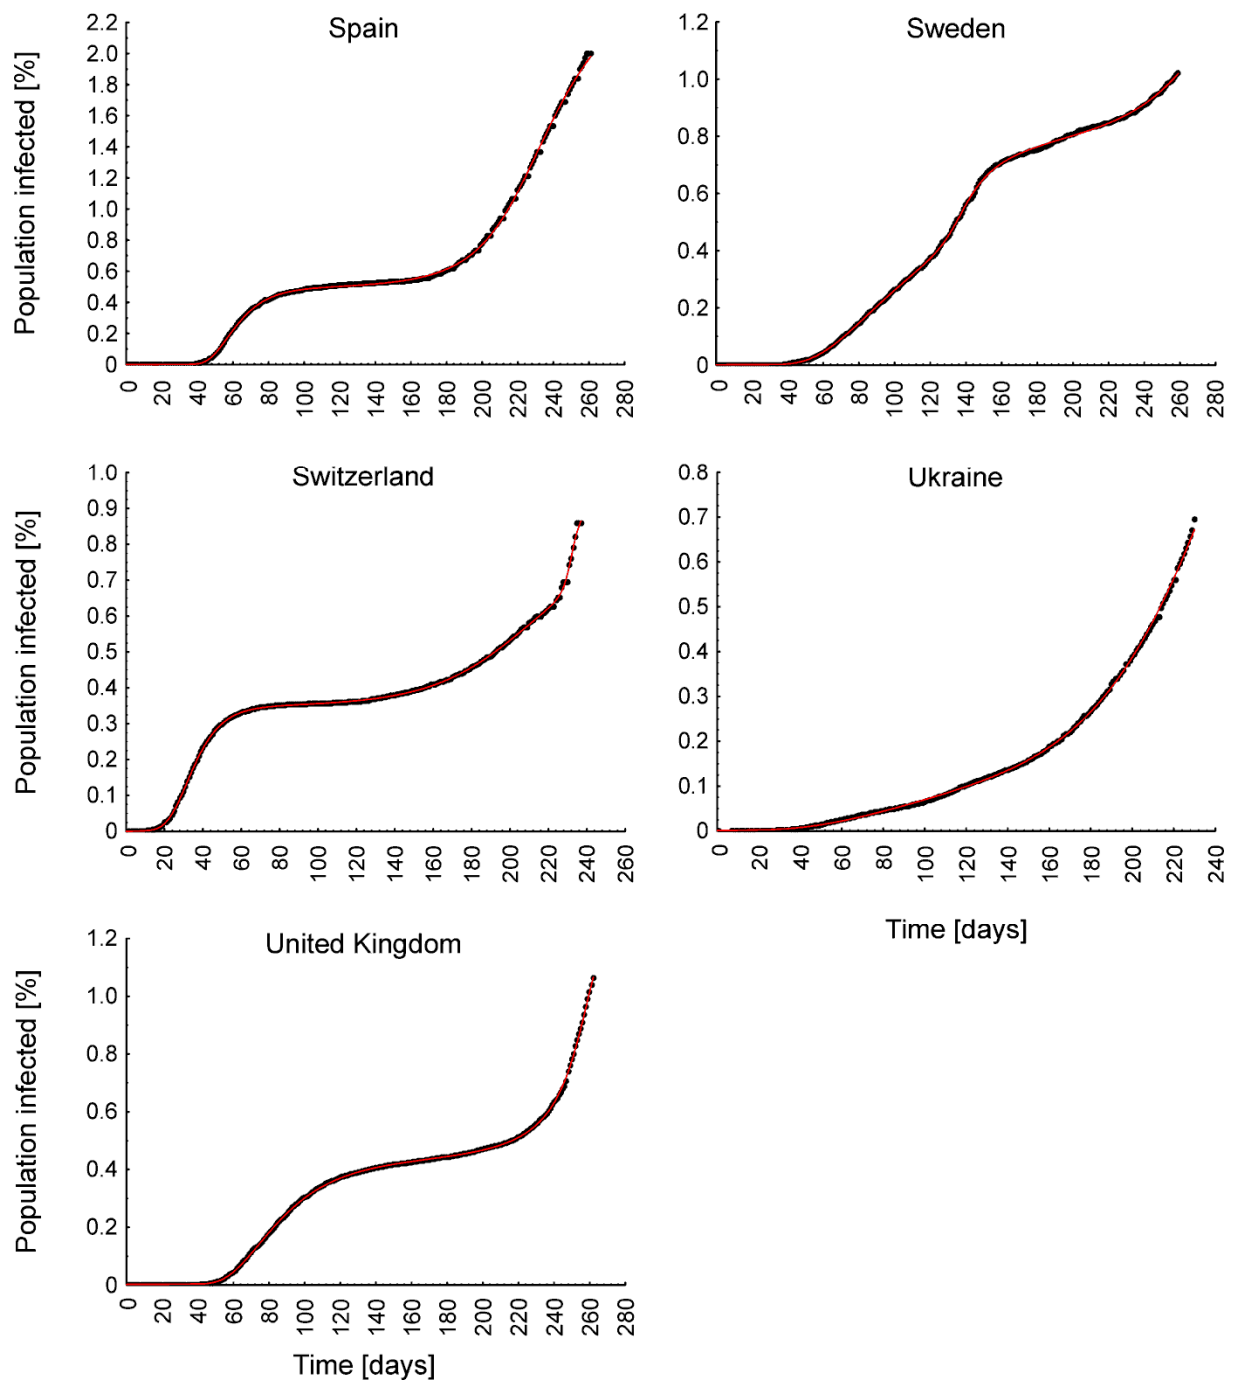

**Figure S8 continued.** Johnson cumulative density functions (red lines) fitted to the data on COVID-19 trajectories (cumulative epidemic curves) in European countries.

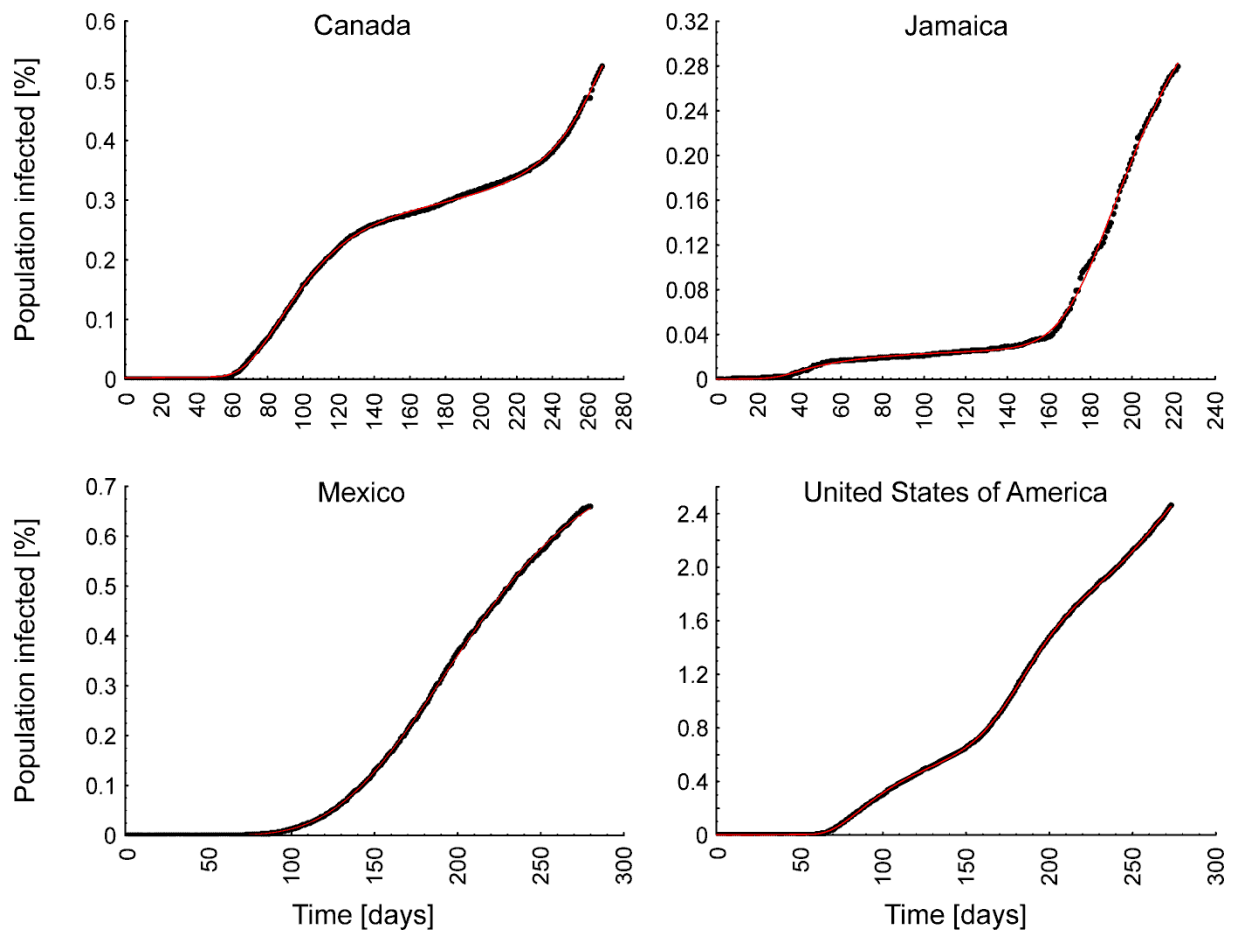

**Figure S9.** Johnson cumulative density functions (red lines) fitted to the data on COVID-19 trajectories (cumulative epidemic curves) in North American countries.

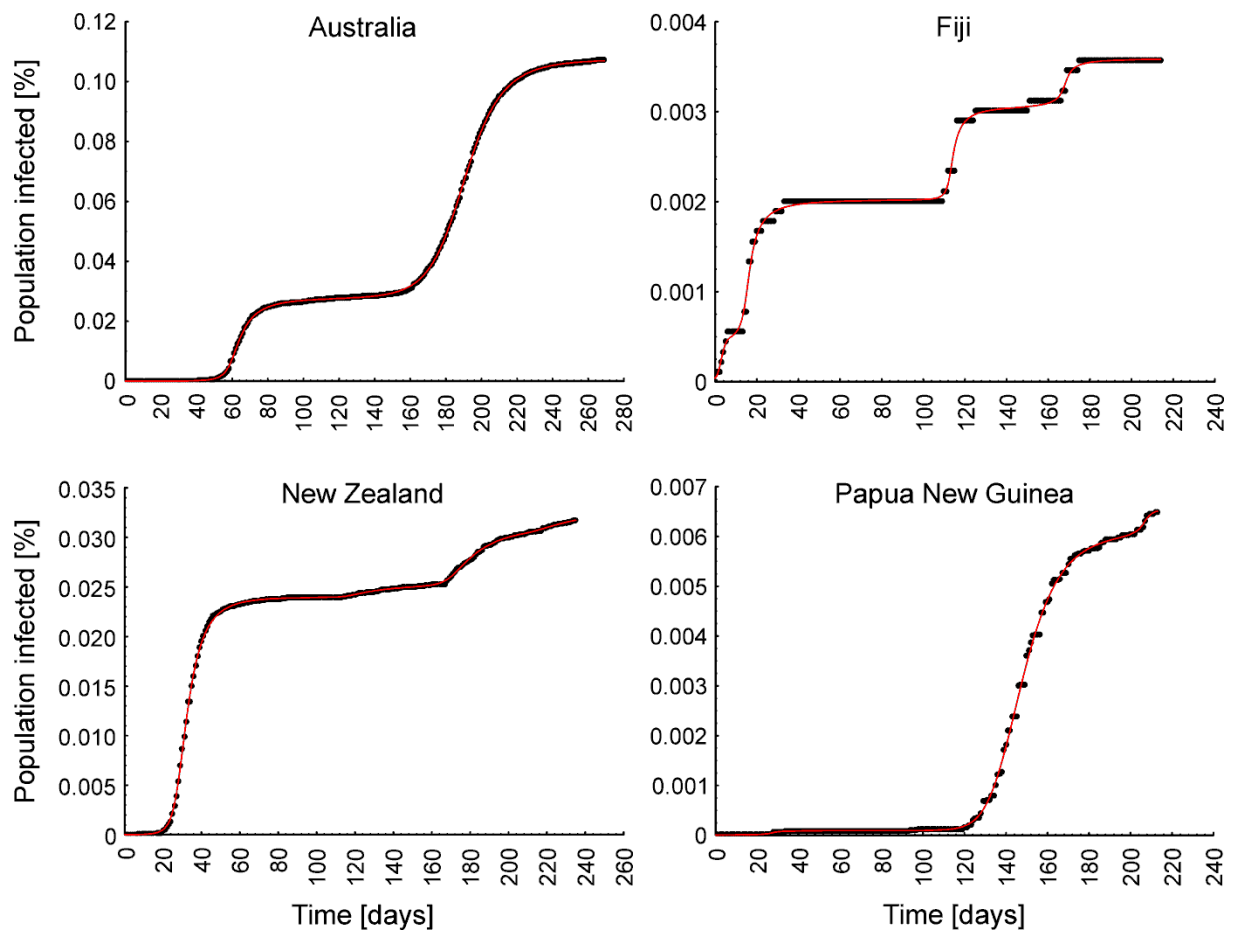

**Figure S10.** Johnson cumulative density functions (red lines) fitted to the data on COVID-19 trajectories (cumulative epidemic curves) in countries in Oceania.

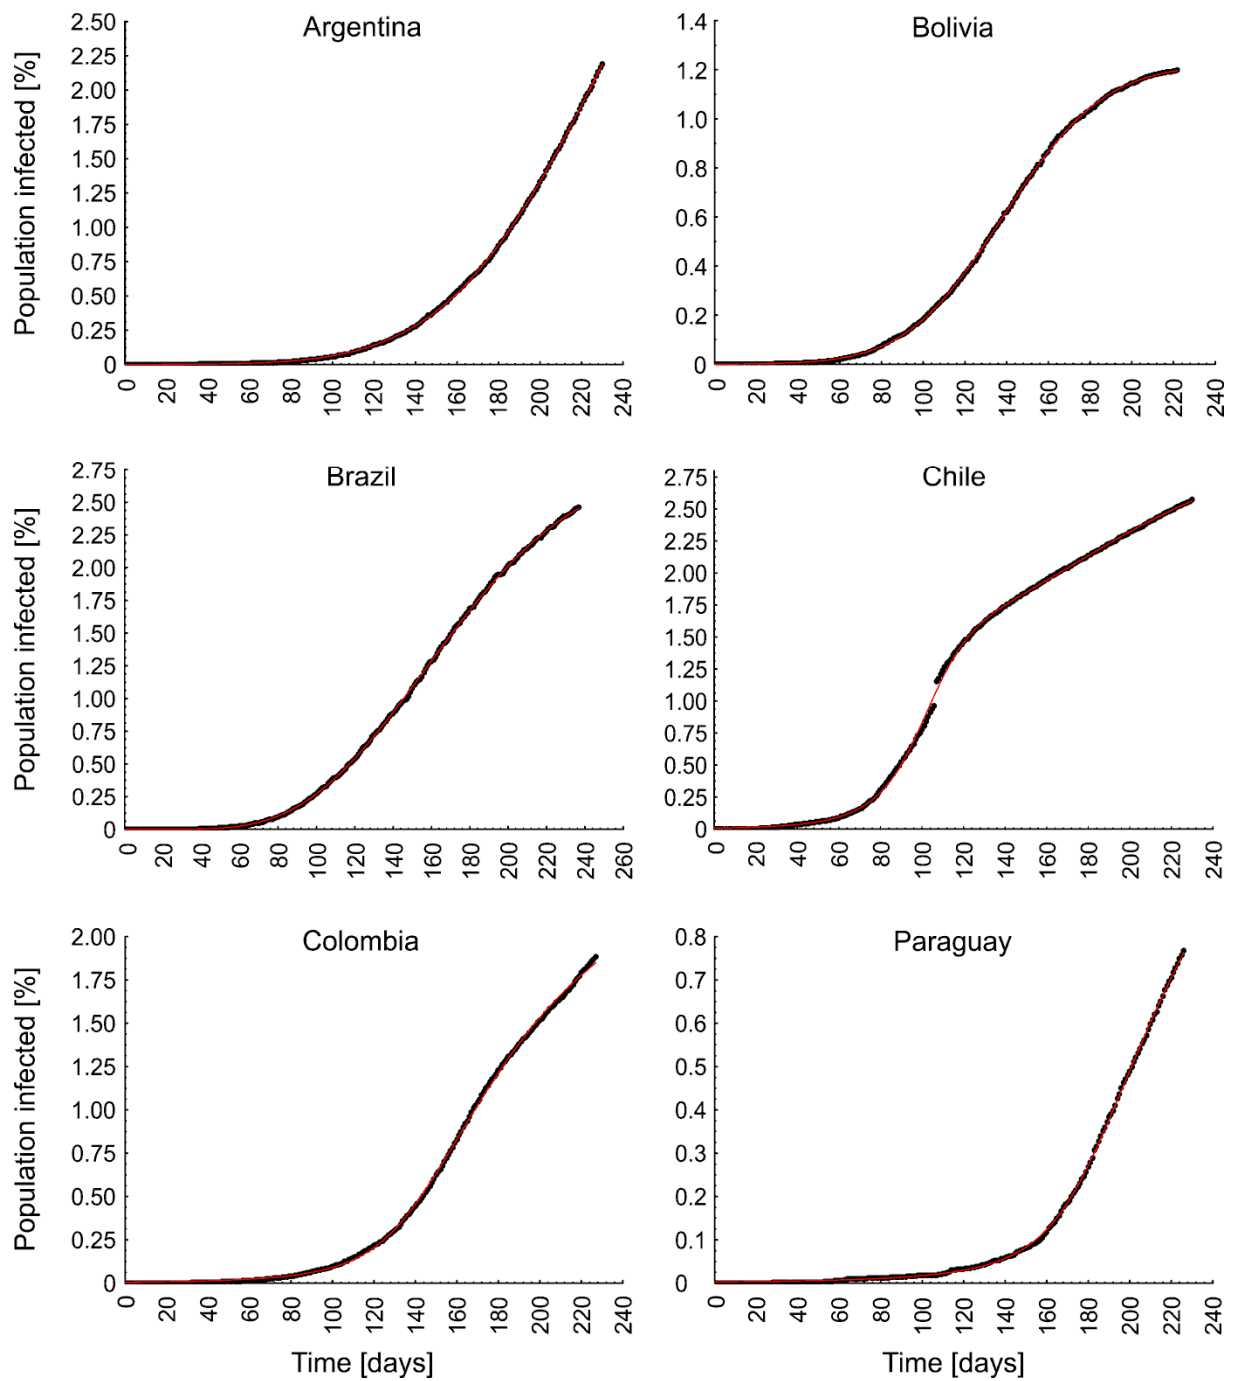

**Figure S11.** Johnson cumulative density functions (red lines) fitted to the data on COVID-19 trajectories (cumulative epidemic curves) in South American countries.

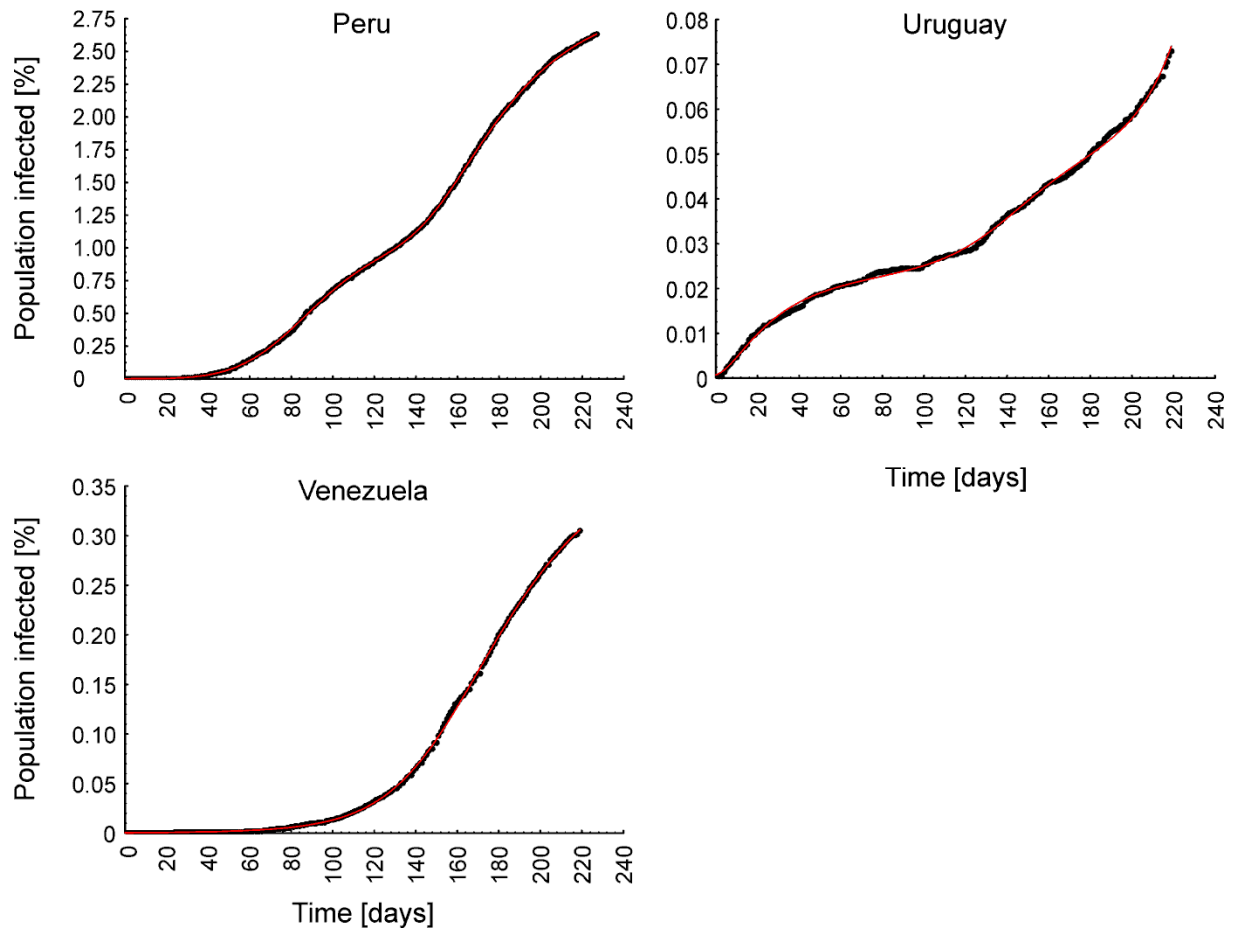

**Figure S11 continued.** Johnson cumulative density functions (red lines) fitted to the data on COVID-19 trajectories (cumulative epidemic curves) in South American countries.

**Table S8.** Number of infection waves ( $N_w$ ) and fitted Johnson cumulative density functions with coefficients of determination ( $R^2$ ) for each of 80 countries.

| Region | Country                      | $N_w$ | Fitted curve                                                                                                                                                    | $R^2$   |
|--------|------------------------------|-------|-----------------------------------------------------------------------------------------------------------------------------------------------------------------|---------|
| Africa | Democratic Republic of Congo | 1     | $E(t)=0.012907*F_{118.898,70.7757,4.41941,62.2782}(t)$                                                                                                          | 0.99970 |
| Africa | Egypt                        | 2     | $E(t)=0.0972531*F_{125.352,30.6693,0.00050384,3.06174}(t)+0.0122929*F_{260.741,54.8242,1.6964,5.5283}(t)$                                                       | 0.99992 |
| Africa | Ethiopia                     | 2     | $E(t)=0.0724824*F_{164.787,40.9673,0.000152085,22.0159}(t)+0.0382048*F_{298.465,166.884,9.18943,308.199}(t)$                                                    | 0.99949 |
| Africa | Kenya                        | 2     | $E(t)=0.0731944*F_{139.094,39.836,0.00513622,17.513}(t)+0.0474776*F_{233.749,18.9369,0.53122,0.515896}(t)$                                                      | 0.99970 |
| Africa | Morocco                      | 3     | $E(t)=0.0141559*F_{59.9864,17.0538,1.02118,1.91984}(t)+0.0834356*F_{171.999,20.6423,0.00891419,0.000862216}(t)+0.805248*F_{241.998,67.234,1.46249,15.7144}(t)$  | 0.99970 |
| Africa | Nigeria                      | 1     | $E(t)=0.0303193*F_{138.608,46.3461,0.618287,1.23014}(t)$                                                                                                        | 0.99981 |
| Africa | Somalia                      | 2     | $E(t)=0.0205073*F_{71.4445,26.9654,0.669545,0.386906}(t)+0.00498195*F_{202.499,28.8392,1.87492,50.8692}(t)$                                                     | 0.99936 |
| Africa | South Africa                 | 1     | $E(t)=1.17782*F_{139.383,39.416,1.9068,30.4609}(t)$                                                                                                             | 0.99982 |
| Africa | South Sudan                  | 2     | $E(t)=0.0215857*F_{72.4221,51.5002,10.3282,487.988}(t)+0.00710007*F_{187.292,68.6273,0.000721799,0.0014819}(t)$                                                 | 0.99832 |
| Africa | Sudan                        | 1     | $E(t)=0.0340264*F_{115.566,73.978,4.41345,50.7955}(t)$                                                                                                          | 0.99935 |
| Africa | Zimbabwe                     | 1     | $E(t)=0.0619585*F_{159.383,81.6095,10.5104,581.313}(t)$                                                                                                         | 0.99892 |
| Asia   | Afghanistan                  | 1     | $E(t)=0.102767*F_{111.081,41.5161,3.53541,51.35}(t)$                                                                                                            | 0.99980 |
| Asia   | Bangladesh                   | 1     | $E(t)=0.348623*F_{232.815,234.097,6.96886,154.172}(t)$                                                                                                          | 0.99987 |
| Asia   | Cambodia                     | 2     | $E(t)=0.000728299*F_{56.3424,9.91615,5.24715,196.964}(t)+0.000953623*F_{179.33,27.6622,0.900536,120.952}(t)$                                                    | 0.99873 |
| Asia   | China                        | 3     | $E(t)=0.00557997*F_{41.168,7.71032,0.00789602,0.335735}(t)+0.000256916*F_{92.3289,16.2606,0.108518,0.011}(t)+0.000482547*F_{219.72,49.6171,6.06916,438.392}(t)$ | 0.99922 |
| Asia   | India                        | 1     | $E(t)=0.722943*F_{230.67,49.6579,0.00668056,0.674791}(t)$                                                                                                       | 0.99991 |
| Asia   | Indonesia                    | 2     | $E(t)=0.0762435*F_{153.723,54.2348,0.00615382,0.282283}(t)+0.124304*F_{246.064,63.3083,2.65265,18.7225}(t)$                                                     | 0.99993 |
| Asia   | Iran                         | 3     | $E(t)=0.0639611*F_{39.748,10.2852,0.00678327,0.000767145}(t)+0.373225*F_{128.03,49.4976,0.00801498,0.0069}(t)+0.539529*F_{257.097,48.9543,0.379968,4.75668}(t)$ | 0.99989 |

**Table S8 continued.** Number of infection waves ( $N_w$ ) and fitted Johnson cumulative density functions with coefficients of determination ( $R^2$ ) for each of 80 countries.

| Region | Country      | $N_w$ | Fitted curve                                                                                                                                                  | $R^2$   |
|--------|--------------|-------|---------------------------------------------------------------------------------------------------------------------------------------------------------------|---------|
| Asia   | Iraq         | 2     | $E(t)=0.131308*F_{129.153,17.7527,0.70030,0.894485}(t)+1.43748*F_{225.835,71.2414,1.4831,6.34081}(t)$                                                         | 0.99997 |
| Asia   | Israel       | 3     | $E(t)=0.178083*F_{47.7947,12.8397,1.23695,2.84856}(t)+1.07353*F_{175.363,53.3451,4.36542,53.2556}(t)+2.75224*F_{217.455,36.3955,0.00702233,106.2}(t)$         | 0.99984 |
| Asia   | Japan        | 3     | $E(t)=0.0129294*F_{92.9975,17.4181,0.367292,11.0077}(t)+0.0549041*F_{223.087,55.3649,6.65743,198.157}(t)+0.024011*F_{283.843,31.084,3.54246e-005,2.01303}(t)$ | 0.99994 |
| Asia   | Lebanon      | 2     | $E(t)=0.125332*F_{182.461,11.1118,0.00612455,0.00375655}(t)+1.22259*F_{231.754,51.8948,0.170241,72.7}(t)$                                                     | 0.99983 |
| Asia   | Myanmar      | 1     | $E(t)=0.231405*F_{278.06,158.573,9.57165,353.868}(t)$                                                                                                         | 0.99929 |
| Asia   | Pakistan     | 2     | $E(t)=0.134688*F_{112.052,32.9648,0.292952,8.18107}(t)+0.0498235*F_{263.816,43.7466,0.0064386,0.00248769}(t)$                                                 | 0.99978 |
| Asia   | Philippines  | 1     | $E(t)=0.464499*F_{258.656,148.513,7.92314,264.871}(t)$                                                                                                        | 0.99954 |
| Asia   | Saudi Arabia | 1     | $E(t)=0.992046*F_{120.187,44.7246,0.754774,2.17753}(t)$                                                                                                       | 0.99954 |
| Asia   | Singapore    | 2     | $E(t)=0.904572*F_{127.87,52.8599,3.45234,28.0657}(t)+0.111026*F_{187.985,8.46479,0.00217685,0.00510362}(t)$                                                   | 0.99986 |
| Asia   | South Korea  | 2     | $E(t)=0.0207541*F_{54.585,36.5873,18.056,1952.21}(t)+0.0355237*F_{233.456,110.451,4.31021,550.873}(t)$                                                        | 0.99710 |
| Asia   | Sri Lanka    | 2     | $E(t)=0.0151098*F_{137.562,47.6004,0.766996,0.792379}(t)+0.0133252*F_{258.358,13.7617,0.555389,62.4503}(t)$                                                   | 0.99570 |
| Asia   | Syria        | 2     | $E(t)=0.0240074*F_{154.728,45.707,0.000259146,89.2068}(t)+0.024922*F_{295.176,230.068,17.5589,1806.64}(t)$                                                    | 0.99975 |
| Asia   | Taiwan       | 3     | $E(t)=0.00190445*F_{68.5568,44.8968,15.0248,9536.08}(t)+0.000229525*F_{242.32,114.578,10.3972,426.548}(t)+0.00198782*F_{302.701,52.1451,11.127,1434.31}(t)$   | 0.99931 |
| Asia   | Thailand     | 2     | $E(t)=0.00410741*F_{80.1918,11.1578,1.21911,2.76417}(t)+0.00121732*F_{198.408,88.4168,0.00801526,0.327718}(t)$                                                | 0.99971 |
| Asia   | Turkey       | 2     | $E(t)=0.218575*F_{62.5161,68.5548,9.28242,325.306}(t)+0.44534*F_{236.638,92.6851,0.149186,0.0249466}(t)$                                                      | 0.99964 |
| Asia   | Vietnam      | 2     | $E(t)=0.000353952*F_{89.8007,188.62,141.486,549249}(t)+0.00083114*F_{205.597,92.0535,98.4422,286635}(t)$                                                      | 0.99917 |



**Table S8 continued.** Number of infection waves ( $N_w$ ) and fitted Johnson cumulative density functions with coefficients of determination ( $R^2$ ) for each of 80 countries.

| Region | Country                | $N_w$ | Fitted curve                                                                                                                                                                                    | $R^2$   |
|--------|------------------------|-------|-------------------------------------------------------------------------------------------------------------------------------------------------------------------------------------------------|---------|
| Europe | Austria                | 2     | $E(t)=0.17527*F_{37.1483,18.2457,4.85582,72.0865}(t)+1.72405*F_{258.79,56.6247,0.331707,6.14541}(t)$                                                                                            | 0.99952 |
| Europe | Belgium                | 3     | $E(t)=0.530032*F_{75.9429,39.6471,7.05439,180.883}(t)+2.30285*F_{254.694,46.6561,0.00106393,1480.24}(t)+0.130713*F_{194.409,23.6728,2.51733,13.0585}(t)$                                        | 0.99947 |
| Europe | Bosnia and Herzegovina | 4     | $E(t)=0.0739929*F_{53.246,28.8839,2.0354,8.1794}(t)+0.538101*F_{157.025,36.0771,1.3177,4.50388}(t)+0.309098*F_{199.417,73.828,6.7710,557.55}(t)+1.99763*F_{250.332,38.156,12.058,967.95}(t)$    | 0.99987 |
| Europe | Bulgaria               | 3     | $E(t)=0.0269585*F_{47.5719,17.7046,0.00146355,0.00307107}(t)+0.249875*F_{156.12,61.25,3.92436,53.962}(t)+0.372563*F_{227.127,41.3025,0.00119748,1039.35}(t)$                                    | 0.99985 |
| Europe | Croatia                | 4     | $E(t)=0.0541405*F_{42.3028,14.5852,1.2054,2.7003}(t)+0.0699166*F_{142.426,19.0722,2.0881,12.541}(t)+0.265581*F_{195.313,26.1445,2.4423,20.489}(t)+1.84424*F_{254.091,25.2158,3.8395,84.862}(t)$ | 0.99987 |
| Europe | Cyprus                 | 3     | $E(t)=0.115092*F_{38.8547,41.5975,11.51,674.693}(t)+0.0427542*F_{153.321,10.3041,0.00302284,0.00496755}(t)+0.685592*F_{241.113,30.4744,0.166811,83.0336}(t)$                                    | 0.99941 |
| Europe | Czechia                | 3     | $E(t)=0.0740236*F_{53.422,57.53,15.7487,1335.66}(t)+0.580889*F_{207.855,84.1427,0.00343905,5776.05}(t)+3.10353*F_{239.091,46.3418,17.1092,6298.29}(t)$                                          | 0.99871 |
| Europe | Finland                | 2     | $E(t)=0.129189*F_{83.5325,23.8704,0.810138,1.19927}(t)+0.343111*F_{277.954,46.5977,1.54627,37.4286}(t)$                                                                                         | 0.99976 |
| Europe | France                 | 2     | $E(t)=0.261132*F_{90.6015,51.8933,7.89034,221.255}(t)+4.10448*F_{297.808,44.9799,0.00799113,0.0101135}(t)$                                                                                      | 0.99946 |
| Europe | Germany                | 3     | $E(t)=0.222966*F_{76.4158,26.2769,3.50858,31.082}(t)+0.181065*F_{233.356,52.564,5.64595e-006,1.93187}(t)+0.20839*F_{274.96,29.9089,5.70031,159.122}(t)$                                         | 0.99993 |
| Europe | Greece                 | 3     | $E(t)=0.0348153*F_{61.9783,63.5106,6.17117,112.763}(t)+0.103529*F_{181.986,20.5377,0.00202955,0.00197367}(t)+0.319133*F_{258.944,42.0616,1.28874,3.10161}(t)$                                   | 0.99963 |
| Europe | Hungary                | 2     | $E(t)=0.0441469*F_{50.6497,22.4631,0.0013507,0.00260687}(t)+0.627712*F_{219.048,23.3921,0.37232,0.258861}(t)$                                                                                   | 0.99897 |

**Table S8 continued.** Number of infection waves ( $N_w$ ) and fitted Johnson cumulative density functions with coefficients of determination ( $R^2$ ) for each of 80 countries.

| Region | Country         | $N_w$ | Fitted curve                                                                                                                                                 | $R^2$   |
|--------|-----------------|-------|--------------------------------------------------------------------------------------------------------------------------------------------------------------|---------|
| Europe | Ireland         | 2     | $E(t)=0.497913*F_{48.895,15.585,0.699044,2.31044}(t)+2.83079*F_{257.14,40.6004,0.195159,34.0572}(t)$                                                         | 0.99966 |
| Europe | Italy           | 2     | $E(t)=0.384347*F_{69.7684,22.9268,1.59687,4.86194}(t)+0.731665*F_{270.257,66.8497,0.00872201,404.655}(t)$                                                    | 0.99940 |
| Europe | Netherlands     | 3     | $E(t)=0.287691*F_{51.6405,28.4184,2.80814,19.3507}(t)+0.0365955*F_{164.368,6.55801,0.00694339,0.00650985}(t)+3.1847*F_{248.207,36.8726,1.49748,24.4172}(t)$  | 0.99991 |
| Europe | North Macedonia | 3     | $E(t)=0.0829176*F_{48.9238,15.1939,0.275836,0.0210793}(t)+1.04243*F_{220.912,154.087,4.53121,51.4201}(t)+1.51616*F_{247.943,25.1638,2.7862e-005,54.5253}(t)$ | 0.99988 |
| Europe | Norway          | 2     | $E(t)=0.163703*F_{42.5197,32.1053,5.21729,85.2685}(t)+0.26025*F_{238.661,52.5603,0.848722,2.75276}(t)$                                                       | 0.99959 |
| Europe | Poland          | 3     | $E(t)=0.132827*F_{102.361,55.4639,0.6934,0.0223507}(t)+0.0668263*F_{166.381,24.9569,0.00170481,11.9708}(t)+2.34471*F_{250.565,18.5969,0.0915285,2.19396}(t)$ | 0.99981 |
| Europe | Portugal        | 3     | $E(t)=0.258048*F_{42.5502,17.561,1.63762,5.12868}(t)+0.215328*F_{112.182,32.6685,0.00328498,1.71916}(t)+1.03118*F_{233.218,58.2843,0.00419217,65.8505}(t)$   | 0.99961 |
| Europe | Romania         | 3     | $E(t)=0.133803*F_{89.3277,70.5765,4.3139,46.2637}(t)+0.780209*F_{239.423,29.0504,0.0001,42.0172}(t)+0.783166*F_{268.079,225.04,9.86942,384.941}(t)$          | 0.99996 |
| Europe | Russia          | 2     | $E(t)=0.824778*F_{175.61,102.354,3.27165,23.6967}(t)+1.02793*F_{281.37,42.8491,1e-005,25.5494}(t)$                                                           | 0.99995 |
| Europe | Serbia          | 3     | $E(t)=0.170125*F_{47.0028,19.5063,1.85867,9.94486}(t)+0.30192*F_{139.757,23.7944,0.442784,1.54262}(t)+1.07463*F_{264.903,30.5913,1.51098,28.8457}(t)$        | 0.99995 |
| Europe | Slovakia        | 2     | $E(t)=0.0210139*F_{36.623,9.83823,0.00649583,0.00114204}(t)+1.44706*F_{237.886,53.2076,8.2407,872.307}(t)$                                                   | 0.99913 |
| Europe | Slovenia        | 3     | $E(t)=0.0667705*F_{31.0458,22.1511,3.82183,44.5024}(t)+0.0372809*F_{153.216,45.378,3.13201,21.426}(t)+3.10237*F_{240.203,26.5982,0.00343161,356.051}(t)$     | 0.99779 |
| Europe | Spain           | 2     | $E(t)=0.488605*F_{64.7353,15.3781,1.33086,3.32056}(t)+2.13144*F_{247.923,61.8614,2.724,31.7884}(t)$                                                          | 0.99955 |

**Table S8 continued.** Number of infection waves ( $N_w$ ) and fitted Johnson cumulative density functions with coefficients of determination ( $R^2$ ) for each of 80 countries.

| Region        | Country                  | $N_w$ | Fitted curve                                                                                                                                                                                            | $R^2$   |
|---------------|--------------------------|-------|---------------------------------------------------------------------------------------------------------------------------------------------------------------------------------------------------------|---------|
| Europe        | Sweden                   | 3     | $E(t)=0.489846*F_{108.244,45.1005,1.56794,4.67754}(t)+0.297079*F_{141.705,25.0865,2.42091,46.5798}(t)+0.814077*F_{279.847,54.6232,0.00622152,10.7975}(t)$                                               | 0.99987 |
| Europe        | Switzerland              | 3     | $E(t)=0.347761*F_{36.8963,13.1397,1.09462,2.6412}(t)+0.45431*F_{209.667,50.124,0.0052421,3.03597}(t)+0.20404*F_{232.143,4.56782,0.00999514,3.2024}(t)$                                                  | 0.99971 |
| Europe        | Ukraine                  | 2     | $E(t)=0.0974848*F_{101.361,42.2545,0.591188,0.0564594}(t)+2.53384*F_{293.439,91.9928,1.15615,4.51605}(t)$                                                                                               | 0.99958 |
| Europe        | United Kingdom           | 2     | $E(t)=0.424517*F_{91.7018,30.9686,1.67723,5.51722}(t)+1.11024*F_{258.58,45.4118,3.7409e-005,286.879}(t)$                                                                                                | 0.99986 |
| North America | Canada                   | 2     | $E(t)=0.280839*F_{104.241,32.1361,1.5151,4.35129}(t)+0.517431*F_{270.257,68.205,0.001574,94.8645}(t)$                                                                                                   | 0.99971 |
| North America | Jamaica                  | 2     | $E(t)=0.0293465*F_{89.9085,126.443,14.6287,1088.16}(t)+0.39252*F_{217.746,51.5602,2.46008,14.1724}(t)$                                                                                                  | 0.99913 |
| North America | Mexico                   | 1     | $E(t)=0.744036*F_{206.989,59.3047,0.429441,0.0393411}(t)$                                                                                                                                               | 0.99987 |
| North America | United States of America | 3     | $E(t)=0.550603*F_{103.596,30.6493,1.66289,5.29818}(t)+1.19572*F_{185.159,30.4121,0.156334,1.74146}(t)+1.84218*F_{312.212,113.282,4.70041,76.1051}(t)$                                                   | 0.99997 |
| Oceania       | Australia                | 2     | $E(t)=0.027695*F_{67.0193,15.1412,4.91014,91.1291}(t)+0.0797208*F_{191.801,22.0842,0.650094,5.48317}(t)$                                                                                                | 0.99996 |
| Oceania       | Fiji                     | 3     | $E(t)=0.00202481*F_{14.5684,13.953,0.000356559,76.545}(t)+0.00101567*F_{115.978,7.33466,6.0608,148.182}(t)+0.000546777*F_{168.152,20.8587,0.000183706,19851.4}(t)$                                      | 0.99497 |
| Oceania       | New Zealand              | 4     | $E(t)=0.0239738*F_{34.354,10.3045,2.70678,22.131}(t)+0.00130462*F_{141.203,39.8374,6.6160,139.061}(t)+0.00603697*F_{189.027,29.2594,4.9602,72.4903}(t)+0.00156923*F_{244.737,35.1765,3.403,25.9784}(t)$ | 0.99982 |
| Oceania       | Papua New Guinea         | 3     | $E(t)=9.57574e-05*F_{27.1931,90.834,0.005145,1.1830e+007}(t)+0.005913*F_{149.554,16.4096,0.9896,2.9169}(t)+0.000620503*F_{206.608,33.8333,0.0014881,108048}(t)$                                         | 0.99949 |

**Table S8 continued.** Number of infection waves ( $N_w$ ) and fitted Johnson cumulative density functions with coefficients of determination ( $R^2$ ) for each of 80 countries.

| Region        | Country   | $N_w$ | Fitted curve                                                                                                                                                | $R^2$   |
|---------------|-----------|-------|-------------------------------------------------------------------------------------------------------------------------------------------------------------|---------|
| South America | Argentina | 2     | $E(t)=0.17527*F_{37.1483,18.2457,4.85582,72.0865}(t)+1.72405*F_{258.79,56.6247,0.331707,6.14541}(t)$                                                        | 0.99992 |
| South America | Bolivia   | 1     | $E(t)=1.22183*F_{139.642,39.0547,0.0962302,0.317568}(t)$                                                                                                    | 0.99992 |
| South America | Brazil    | 1     | $E(t)=2.74199*F_{167.255,53.0097,0.284768,0.236245}(t)$                                                                                                     | 0.99992 |
| South America | Chile     | 2     | $E(t)=1.81944*F_{102.247,28.2296,0.0048419,8.30444}(t)+1.30239*F_{236.372,83.3318,1.9275,7.26942}(t)$                                                       | 0.99966 |
| South America | Colombia  | 1     | $E(t)=2.79391*F_{232.005,160.021,6.71011,152.059}(t)$                                                                                                       | 0.99971 |
| South America | Paraguay  | 1     | $E(t)=1.92033*F_{351.719,398.677,15.815,1351.45}(t)$                                                                                                        | 0.99979 |
| South America | Peru      | 2     | $E(t)=0.933518*F_{86.145,25.0466,0.00462452,0.00837006}(t)+2.06124*F_{190.799,55.982,2.64435,17.9234}(t)$                                                   | 0.99995 |
| South America | Uruguay   | 3     | $E(t)=0.0240813*F_{37.6414,38.1737,3.22348,22.897}(t)+0.0214958*F_{146.316,28.0122,0.144591,0.00416435}(t)+0.109209*F_{238.163,66.7847,3.37775,455.887}(t)$ | 0.99855 |
| South America | Venezuela | 1     | $E(t)=0.398944*F_{188.667,61.1926,1.55804,8.43544}(t)$                                                                                                      | 0.99978 |

**Table S9.** Basic parameters of the first infection wave dynamics calculated using Johnson cumulative density functions fitted to the pandemic wave in a given country.  $S$  - skewness parameter of the fitted Johnson CDF,  $P_{inf}$  - percentage of infections during the epidemic wave,  $Q_{2.5\%}$  - the day the infection wave started,  $Q_{50\%}$  - the day that half the total percentage of infections during a given wave was reached,  $Q_{97.5\%}$  - the day the infection wave ended,  $M$  - the day the peak occurred,  $t_i$  - the duration of the wave increase,  $t_d$  - the duration of the wave decrease,  $T$  - the wave duration, and  $A$  - the asymmetry of the infection wave.

| Region | Country                      | $S$    | $P_{inf}$ | $Q_{2.5\%}$ | $Q_{50\%}$ | $Q_{97.5\%}$ | $M$ | $t_i$ | $t_d$ | $T$ | $A$   |
|--------|------------------------------|--------|-----------|-------------|------------|--------------|-----|-------|-------|-----|-------|
| Africa | Democratic Republic of Congo | 4.42   | 0.01291   | 39          | 103        | 293          | 90  | 51    | 203   | 255 | 3.96  |
| Africa | Egypt                        | 0.001  | 0.09725   | 63          | 125        | 187          | 125 | 62    | 62    | 124 | 1.01  |
| Africa | Ethiopia                     | 0.0002 | 0.07248   | 84          | 165        | 246          | 165 | 81    | 81    | 162 | 0.99  |
| Africa | Kenya                        | 0.01   | 0.07319   | 60          | 139        | 218          | 139 | 79    | 79    | 158 | 1.00  |
| Africa | Morocco                      | 1.02   | 0.01416   | 34          | 57         | 100          | 53  | 19    | 47    | 66  | 2.55  |
| Africa | Nigeria                      | 0.62   | 0.03032   | 59          | 135        | 242          | 128 | 69    | 114   | 183 | 1.65  |
| Africa | Somalia                      | 0.67   | 0.02051   | 29          | 68         | 133          | 60  | 31    | 73    | 104 | 2.34  |
| Africa | South Africa                 | 1.91   | 1.17782   | 74          | 136        | 227          | 133 | 59    | 94    | 153 | 1.58  |
| Africa | South Sudan                  | 10.33  | 0.02159   | 30          | 61         | 188          | 54  | 24    | 134   | 158 | 5.58  |
| Africa | Sudan                        | 4.41   | 0.03403   | 48          | 95         | 306          | 74  | 26    | 232   | 258 | 8.90  |
| Africa | Zimbabwe                     | 10.51  | 0.06196   | 82          | 143        | 337          | 134 | 52    | 203   | 255 | 3.94  |
| Asia   | Afghanistan                  | 3.54   | 0.10277   | 54          | 104        | 209          | 100 | 46    | 109   | 155 | 2.38  |
| Asia   | Bangladesh                   | 6.97   | 0.34862   | 65          | 166        | 811          | 110 | 45    | 701   | 746 | 15.57 |
| Asia   | Cambodia                     | 5.25   | 0.00073   | 43          | 55         | 78           | 52  | 9     | 26    | 35  | 2.76  |
| Asia   | China                        | 0.01   | 0.00558   | 26          | 41         | 56           | 42  | 16    | 14    | 31  | 0.90  |
| Asia   | India                        | 0.01   | 0.72294   | 132         | 231        | 330          | 231 | 99    | 99    | 198 | 0.99  |
| Asia   | Indonesia                    | 0.01   | 0.07624   | 47          | 154        | 261          | 154 | 107   | 107   | 214 | 0.99  |
| Asia   | Iran                         | 0.01   | 0.06396   | 20          | 40         | 60           | 40  | 20    | 20    | 40  | 0.98  |
| Asia   | Iraq                         | 0.70   | 0.13131   | 100         | 127        | 169          | 123 | 23    | 46    | 69  | 2.03  |
| Asia   | Israel                       | 1.24   | 0.17808   | 30          | 46         | 79           | 44  | 14    | 35    | 49  | 2.42  |
| Asia   | Japan                        | 0.37   | 0.01293   | 59          | 93         | 129          | 92  | 33    | 37    | 70  | 1.14  |
| Asia   | Lebanon                      | 0.01   | 0.12533   | 161         | 182        | 204          | 182 | 21    | 22    | 44  | 1.04  |
| Asia   | Myanmar                      | 9.57   | 0.23141   | 175         | 234        | 650          | 204 | 29    | 446   | 474 | 15.56 |
| Asia   | Pakistan                     | 0.29   | 0.13469   | 48          | 111        | 181          | 111 | 63    | 70    | 133 | 1.10  |
| Asia   | Philippines                  | 7.92   | 0.46450   | 115         | 226        | 602          | 206 | 91    | 396   | 487 | 4.33  |
| Asia   | Saudi Arabia                 | 0.75   | 0.99205   | 43          | 116        | 221          | 110 | 67    | 111   | 178 | 1.67  |
| Asia   | Singapore                    | 3.45   | 0.90457   | 75          | 114        | 265          | 97  | 22    | 168   | 190 | 7.82  |
| Asia   | South Korea                  | 18.06  | 0.02075   | 35          | 46         | 130          | 41  | 6     | 89    | 95  | 14.08 |
| Asia   | Sri Lanka                    | 0.77   | 0.01511   | 63          | 131        | 247          | 118 | 55    | 129   | 184 | 2.35  |
| Asia   | Syria                        | 0.00   | 0.02401   | 70          | 155        | 240          | 155 | 85    | 85    | 170 | 0.99  |
| Asia   | Taiwan                       | 15.02  | 0.00190   | 18          | 66         | 135          | 65  | 47    | 70    | 117 | 1.48  |
| Asia   | Thailand                     | 1.22   | 0.00411   | 64          | 78         | 107          | 75  | 11    | 32    | 43  | 3.01  |
| Asia   | Turkey                       | 9.28   | 0.21858   | 18          | 43         | 224          | 28  | 10    | 196   | 206 | 19.95 |
| Asia   | Vietnam                      | 141.49 | 0.00035   | 22          | 65         | 304          | 60  | 38    | 244   | 282 | 6.46  |

**Table S9 continued.** Basic parameters of the first infection wave dynamics calculated using the Johnson cumulative density function fitted to the pandemic wave in a given country.  $S$  - skewness parameter of the fitted Johnson CDF,  $P_{inf}$  - percentage of infections during an epidemic wave  $Q_{2.5\%}$  - the day the infection wave started,  $Q_{50\%}$  - the day that half the total percentage of infections during a given wave was reached,  $Q_{97.5\%}$  - the day the infection wave ended,  $M$  - the day the peak occurred,  $t_i$  - the duration of the wave increase,  $t_d$  - the duration of the wave decrease,  $T$  - the wave duration, and  $A$  - the asymmetry of the infection wave.

| Region        | Country                  | $S$   | $P_{inf}$ | $Q_{2.5\%}$ | $Q_{50\%}$ | $Q_{97.5\%}$ | $M$ | $t_i$ | $t_d$ | $T$ | $A$   |
|---------------|--------------------------|-------|-----------|-------------|------------|--------------|-----|-------|-------|-----|-------|
| Europe        | Austria                  | 4.86  | 0.17527   | 18          | 33         | 83           | 29  | 11    | 54    | 64  | 5.01  |
| Europe        | Belgium                  | 7.05  | 0.53003   | 40          | 66         | 171          | 60  | 20    | 111   | 131 | 5.47  |
| Europe        | Bosnia and Herzegovina   | 2.04  | 0.07399   | 19          | 46         | 128          | 35  | 16    | 93    | 108 | 5.82  |
| Europe        | Bulgaria                 | 0.00  | 0.02696   | 13          | 48         | 82           | 49  | 36    | 33    | 69  | 0.92  |
| Europe        | Croatia                  | 1.21  | 0.05414   | 21          | 40         | 78           | 35  | 14    | 43    | 56  | 3.14  |
| Europe        | Cyprus                   | 11.51 | 0.11509   | 4           | 30         | 130          | 25  | 21    | 105   | 126 | 4.94  |
| Europe        | Czechia                  | 15.75 | 0.07402   | 22          | 39         | 175          | 31  | 9     | 144   | 153 | 16.33 |
| Europe        | Finland                  | 0.81  | 0.12919   | 46          | 81         | 139          | 75  | 29    | 64    | 93  | 2.17  |
| Europe        | France                   | 7.89  | 0.26113   | 51          | 77         | 215          | 67  | 16    | 148   | 164 | 9.29  |
| Europe        | Germany                  | 3.51  | 0.22297   | 48          | 70         | 144          | 63  | 15    | 81    | 95  | 5.55  |
| Europe        | Greece                   | 6.17  | 0.03482   | 15          | 44         | 221          | 27  | 12    | 194   | 207 | 15.67 |
| Europe        | Hungary                  | 0.00  | 0.04415   | 7           | 51         | 95           | 51  | 44    | 44    | 88  | 0.98  |
| Europe        | Ireland                  | 0.70  | 0.49791   | 22          | 48         | 84           | 46  | 24    | 38    | 62  | 1.54  |
| Europe        | Italy                    | 1.60  | 0.38435   | 40          | 65         | 127          | 57  | 17    | 70    | 87  | 4.13  |
| Europe        | Netherlands              | 2.81  | 0.28769   | 18          | 45         | 124          | 37  | 19    | 87    | 106 | 4.60  |
| Europe        | North Macedonia          | 0.28  | 0.08292   | 21          | 48         | 81           | 47  | 26    | 34    | 59  | 1.31  |
| Europe        | Norway                   | 5.22  | 0.16370   | 10          | 35         | 122          | 28  | 18    | 94    | 112 | 5.33  |
| Europe        | Poland                   | 0.69  | 0.13283   | 21          | 93         | 229          | 64  | 43    | 165   | 208 | 3.88  |
| Europe        | Portugal                 | 1.64  | 0.25805   | 20          | 39         | 87           | 33  | 13    | 54    | 67  | 4.12  |
| Europe        | Romania                  | 4.31  | 0.13380   | 29          | 69         | 273          | 46  | 17    | 227   | 244 | 13.17 |
| Europe        | Russia                   | 3.27  | 0.82478   | 78          | 147        | 445          | 109 | 31    | 336   | 366 | 10.96 |
| Europe        | Serbia                   | 1.86  | 0.17013   | 19          | 44         | 95           | 40  | 21    | 55    | 76  | 2.56  |
| Europe        | Slovakia                 | 0.01  | 0.02101   | 17          | 37         | 56           | 37  | 20    | 19    | 39  | 0.96  |
| Europe        | Slovenia                 | 3.82  | 0.06677   | 5           | 26         | 86           | 20  | 15    | 66    | 81  | 4.36  |
| Europe        | Spain                    | 1.33  | 0.48861   | 43          | 62         | 103          | 57  | 14    | 46    | 59  | 3.37  |
| Europe        | Sweden                   | 1.57  | 0.48985   | 49          | 99         | 221          | 83  | 34    | 138   | 172 | 4.09  |
| Europe        | Switzerland              | 1.09  | 0.34776   | 17          | 35         | 68           | 32  | 15    | 36    | 51  | 2.39  |
| Europe        | Ukraine                  | 0.59  | 0.09748   | 35          | 96         | 196          | 83  | 48    | 113   | 161 | 2.33  |
| Europe        | United Kingdom           | 1.68  | 0.42452   | 52          | 85         | 170          | 74  | 22    | 96    | 118 | 4.30  |
| North America | Canada                   | 1.52  | 0.28084   | 62          | 98         | 184          | 87  | 25    | 97    | 123 | 3.84  |
| North America | Jamaica                  | 14.63 | 0.02347   | 21          | 57         | 363          | 36  | 15    | 327   | 341 | 22.39 |
| North America | Mexico                   | 0.43  | 0.74404   | 105         | 202        | 335          | 191 | 86    | 144   | 229 | 1.68  |
| North America | United States of America | 1.66  | 0.55060   | 64          | 97         | 181          | 86  | 22    | 95    | 117 | 4.39  |

**Table S9 continued.** Basic parameters of the first infection wave dynamics calculated using the Johnson cumulative density function fitted to the pandemic wave in a given country.  $S$  - skewness parameter of the fitted Johnson CDF,  $P_{inf}$  - percentage of infections during an epidemic wave  $Q_{2.5\%}$  - the day the infection wave started,  $Q_{50\%}$  - the day that half the total percentage of infections during a given wave was reached,  $Q_{97.5\%}$  - the day the infection wave ended,  $M$  - the day the peak occurred,  $t_i$  - the duration of the wave increase,  $t_d$  - the duration of the wave decrease,  $T$  - the wave duration, and  $A$  - the asymmetry of the infection wave.

| Region        | Country          | $S$   | $P_{inf}$ | $Q_{2.5\%}$ | $Q_{50\%}$ | $Q_{97.5\%}$ | $M$ | $t_i$ | $t_d$ | $T$  | $A$   |
|---------------|------------------|-------|-----------|-------------|------------|--------------|-----|-------|-------|------|-------|
| Oceania       | Australia        | 4.91  | 0.02770   | 49          | 64         | 103          | 62  | 13    | 41    | 54   | 3.16  |
| Oceania       | Fiji             | 0.00  | 0.00202   | -13         | 15         | 42           | 15  | 28    | 27    | 55   | 0.97  |
| Oceania       | New Zealand      | 2.71  | 0.02397   | 21          | 32         | 60           | 30  | 9     | 30    | 39   | 3.15  |
| Oceania       | Papua New Guinea | 0.01  | 0.00010   | -25         | 27         | 79           | 27  | 52    | 52    | 104  | 1.01  |
| South America | Argentina        | 0.00  | 4.53221   | 114         | 233        | 351          | 233 | 119   | 118   | 237  | 0.99  |
| South America | Bolivia          | 0.10  | 1.22183   | 64          | 139        | 219          | 138 | 74    | 81    | 154  | 1.09  |
| South America | Brazil           | 0.28  | 2.74199   | 70          | 165        | 279          | 157 | 87    | 122   | 208  | 1.40  |
| South America | Chile            | 0.00  | 1.81944   | 45          | 102        | 159          | 100 | 55    | 59    | 114  | 1.08  |
| South America | Colombia         | 6.71  | 2.79391   | 93          | 191        | 622          | 160 | 67    | 462   | 528  | 6.90  |
| South America | Paraguay         | 15.82 | 1.92033   | 135         | 250        | 1196         | 197 | 62    | 999   | 1061 | 16.10 |
| South America | Peru             | 0.00  | 0.93352   | 37          | 86         | 135          | 86  | 49    | 49    | 98   | 1.01  |
| South America | Uruguay          | 3.22  | 0.02408   | 1           | 27         | 138          | 13  | 12    | 125   | 137  | 10.52 |
| South America | Venezuela        | 1.56  | 0.39894   | 93          | 180        | 334          | 170 | 77    | 164   | 241  | 2.13  |

## Fitting Johnson curves to the ongoing wave: forecasting possibilities

The accuracy of forecasts is discussed on the basis of data relating to the first wave of infections in the United Kingdom. The UK was selected because it is both highly populated (67,886,004) and, among European countries, has carried out the most test, with a mean of 126.33 tests per 1,000 since the beginning of the pandemic up to 19 October 2020.

The first wave of infections was described using the Johnson Cumulative Density Curve, and parameters  $P_{inf}$ ,  $Q_{2.5\%}$ ,  $M$ ,  $Q_{97.5\%}$ ,  $T_i$ ,  $T_d$  and  $T$  were calculated. The values obtained for  $Q_{2.5\%}$ ,  $M$  and  $Q_{97.5\%}$  indicated that the first wave of infections in the UK started on the 51<sup>st</sup> and finished on the 170<sup>th</sup> day of the epidemic, while the wave peaked on the 74<sup>th</sup> day. Then, a series of forecasts were made by fitting Johnson distribution curves to the data cut to the first 60, 70, 80, 90, 100, 110, 120, 130, 140, 150 and 160 days of the epidemic.  $P_{inf}$ ,  $Q_{2.5\%}$ ,  $M$ ,  $Q_{97.5\%}$ ,  $T_i$ ,  $T_d$  and  $T$  were calculated for each forecast; the results are listed in Table S10. In addition, the percentage difference between the actual and predicted percentage of infections on each day was calculated for each forecast (starting from the forecast day to its end at  $t=170$ ; see Fig. S12). Fig. S13 illustrates the example forecasts based on days 60, 90, 210 and 150 compared to the Johnson distribution curve fitted to the complete data.

The results showed that the predicted parameters describing the day of the wave peak, the day the infection wave ended, and the duration of the wave, its increase and decrease did not differ much from the values obtained using the complete dataset for the first wave of infections in the UK (Table S10). However, the percentages of the population infected predicted using only days 70 and 80 were approximately 0.1% lower than the actual figures. This means that, if recalculated to the number of infections, the predicted number of infections was approximately 68,000 lower than the actual number. This suggests that such early predictions (prior to the peak) made using Johnson CDF fitting should focus on predicting the day of the peak rather than the number of infections. Additionally, for early forecasts, the predicted daily percentages of infections differed from the actual percentages of infections by more than 10% in the longer term (Fig. S12). However, the predictions made after the wave had peaked were consistent with the observations.

It also needs to be highlighted that this curve fitting method was designed primarily not for making forecasts but rather for obtaining easily interpretable parameters describing the past trajectory of COVID-19 infections. Thus, extreme caution is advisable when forecasting the future trajectory of the infection wave and its parameters (see the Discussion).



**Table S10.** Parameters describing the percentage of the infected population ( $P_{inf}$ ), the day the infection wave started ( $Q_{2.5\%}$ ), the day the wave peaked ( $M$ ), the day the infection wave ended ( $Q_{97.5\%}$ ), the duration of the wave increase ( $T_i$ ), the duration of the wave decrease ( $T_d$ ) and the duration of the wave of infections ( $T$ ) for each forecast using a different number of days from the beginning of the epidemic ( $t=0$ ) to the end of the first infection wave ( $t=170$ ).

| Days used                    | $P_{inf}$ | $Q_{2.5\%}$ | $M$ | $Q_{97.5\%}$ | $T_i$ | $T_d$ | $T$ |
|------------------------------|-----------|-------------|-----|--------------|-------|-------|-----|
| 60 (9 days after wave start) | 0.434241  | 51          | 74  | 157          | 23    | 83    | 106 |
| 70                           | 0.334370  | 49          | 69  | 165          | 20    | 96    | 116 |
| 80                           | 0.338205  | 49          | 69  | 169          | 20    | 100   | 120 |
| 90                           | 0.414673  | 50          | 75  | 161          | 25    | 86    | 111 |
| 100                          | 0.444636  | 51          | 75  | 170          | 24    | 95    | 119 |
| 110                          | 0.459856  | 51          | 75  | 180          | 24    | 105   | 129 |
| 120                          | 0.444350  | 51          | 75  | 170          | 24    | 95    | 120 |
| 130                          | 0.433287  | 50          | 75  | 163          | 25    | 88    | 112 |
| 140                          | 0.430665  | 50          | 76  | 161          | 26    | 85    | 111 |
| 150                          | 0.433254  | 50          | 75  | 163          | 25    | 88    | 113 |
| 160                          | 0.437829  | 50          | 75  | 168          | 25    | 93    | 118 |
| 170 (complete wave)          | 0.424517  | 52          | 74  | 170          | 22    | 96    | 118 |

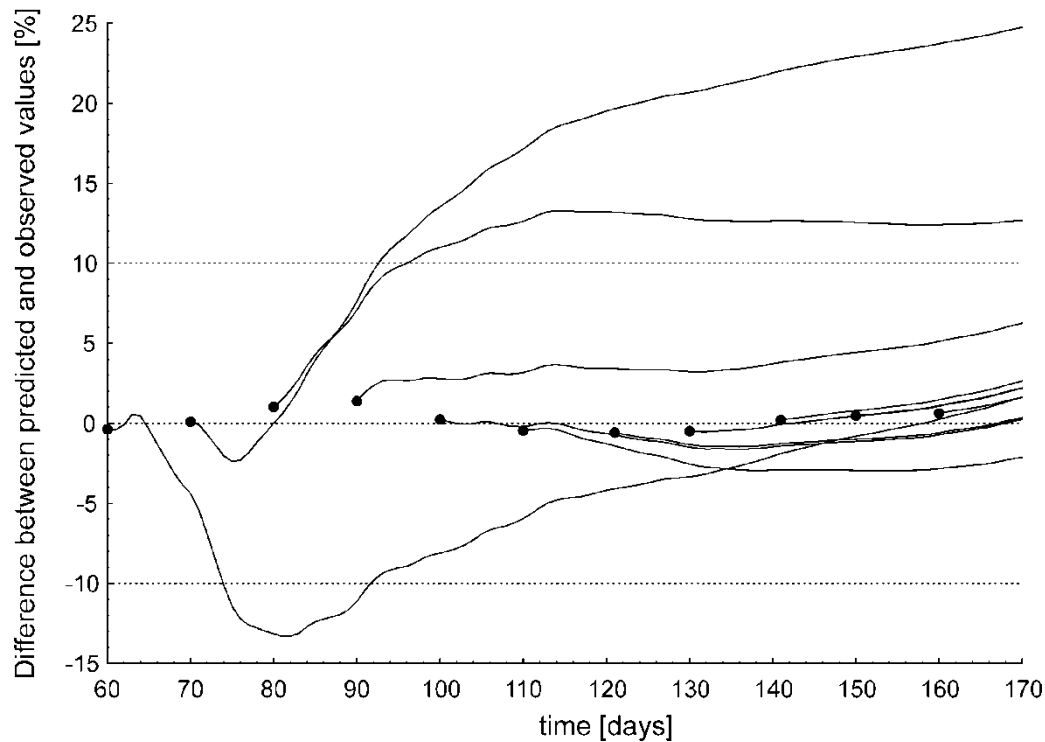

**Figure S12.** The percentage difference between the actual percentage of the population infected and the predicted percentage of the population infected for 11 forecasts using different numbers of days (60, 70, 80, 90, 100, 110, 120, 130, 140, 150 and 160), starting from the forecast day to the end at  $t=170$ .

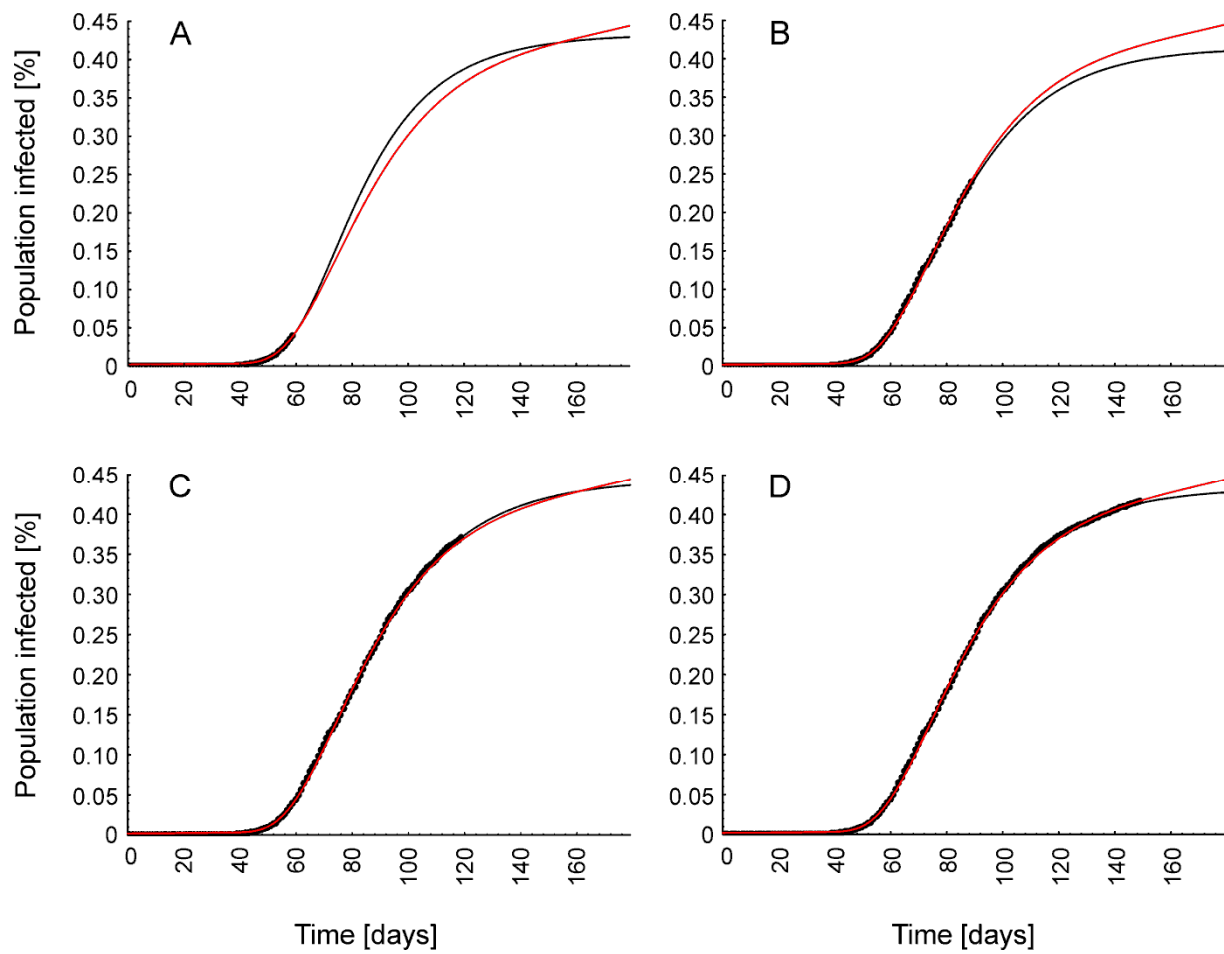

**Figure S13.** Examples of predictions of the future trajectory of the infection wave (black line) using data (black dots) from days 60 (A), 90 (B), 120 (C) and 150 (D) in comparison to the actual trajectory of the infection wave (red line).
